# Supplementary material for: SMAC mimetic drives microglia phenotype and glioblastoma immune microenvironment
Source: PubMed Central journal article supplement (PMC11402972; doi:10.1038/s41419-024-07056-z), 2024-09-15
Supplement: 41419_2024_7056_MOESM1_ESM.pdf [file 41419_2024_7056_MOESM1_ESM.pdf]

1 **SMAC mimetic drives microglia phenotype and glioblastoma immune**  
2 **microenvironment**

3 Emmanuel Snacel-Fazy<sup>1,2</sup>, Aurélie Soubéran<sup>1,2,3</sup>, Magali Grange<sup>4</sup>, Kevin Joseph<sup>5,6,7,8</sup>, Carole  
4 Colin<sup>1,2</sup>, Philippe Morando<sup>1,2</sup>, Hervé Luche<sup>4</sup>, Alessandra Pagano<sup>1</sup>, Sophie Brustlein<sup>9</sup>, Franck  
5 Debarbieux<sup>10</sup>, Soline Toutain<sup>1,2</sup>, Carole Siret<sup>11</sup>, Serge A. van de Pavert<sup>11</sup>, Geneviève Rougon<sup>10</sup>,  
6 Dominique Figarella-Branger<sup>1</sup>, Vidhya Madapusi Ravi<sup>5,6,7,8</sup>, Emeline Tabouret<sup>1,3,12</sup> and Aurélie  
7 Tchoghandjian<sup>1,2\*</sup>

8  
9 **Supplementary Material and Methods**

10 **Single-cell RNA sequencing**

11 scRNAseq analysis was carried out using a publicly available integrated dataset from the  
12 Glioblastoma microenvironment (<https://doi.org/10.1101/2022.08.27.505439>, Ruiz-Moreno,  
13 Cristian. GBmap. (2022) doi:10.5281/zenodo.6962901.). This dataset was composed by the  
14 integration of 16 datasets, with 338,564 cells from a total of 110 patients. The dataset comprised  
15 of 127,521 neoplastic cells and 211043 cells from the local microenvironment, all annotated at  
16 multiple levels.

17 The data was analyzed, and visualizations were created out using the Seurat package for single  
18 cell RNAseq data [49-52]. Dotplots of gene expression across all cellular populations was  
19 carried out using the “Dotplot” function implemented within Seurat. Kernel based visualization  
20 of gene expression of interest within cellular populations was carried out using the  
21 “plot\_density” function, included within the Nebulosa package for R [53]. All analysis was  
22 carried out in the R computing environment.

23 **GL-261-Dsred and CT2A cell culture**

24 GL261-DsRed [17] and CT2A cells (Sigma-Aldrich, Paris, France ; newly purchased) were  
25 cultured as previously described To grow as spheroids, 5000 cells were cultured per well in

26 96-well plats U-bottom with a supplement of 20% of methylcellulose for 24 h. Mycoplasma  
27 detection was regularly performed during the time of the experimentations.

### 28 **ML-IAP silencing by siRNA technology**

29 Cells were transfected with lipofectamine 2000 (ref. 11668027, Thermoficher), diluted in  
30 OPTIMEM (ref. 31985062, Gibco) and with the different siRNA targeting ML-IAP at the  
31 concentration of 40 nM. The sequences were the following: si-RNA 1 (5'-  
32 GACCTAAAGACAGTGC CAAGTGCCT-3' ; exon 1 position 197-222 pb), si-RNA 2 (5'-  
33 GAAGAGACTTTGTCC ACAGTGTGCA-3' ; exon 3 position 668-693 pb), si-RNA 3 (5'-  
34 CCTGGTCTGTGCTGAG TGT-3' ; exon 6 position 999-1018 pb), si-RNA 4 (5'-  
35 GGAAGAGACTTTGTCCACA-3' ; exon 3 position 667-686). After 24 hours, the expression  
36 of ML-IAP was analyzed in cell protein lysats by western blotting.

### 37 **Explant cultures**

38 Explant cultures were performed as previously described [54]. Five GB tissue samples were  
39 collected after surgery and placed in HBSS. Tissues were cut into 500 µm pieces with a tissue  
40 chopper (Phymep) and plated on 24-well plates precoated with poly-(L)-lysine (10 µg/ml;  
41 Sigma-Aldrich). Explants were cultured in a serum-free medium composed of DMEM/F12  
42 medium supplemented with hormones, anti-biotics and growth factors as previously described  
43 [47] at 37°C in a humidified atmosphere of 5% CO<sub>2</sub> and 95% air including 20% O<sub>2</sub>. After 7-10  
44 days of culture, explants were treated with vehicle (DMSO) or 1 µM of SMg for 72h. Then  
45 explants were washed with PBS and fixed with paraformaldehyde 4% for immunostainings.

### 46 **Glioma mouse models**

47 One hundred mouse glioma GL261-DsRed cells were implanted in the cortex of 7 weeks-old  
48 C57BL/6 mice as already described [17]. Briefly, 50.000 cells/µl were automatically injected  
49 into the cerebral cortex (-1 mm anterior to bregma, - 1 mm lateral and - 1 mm in deep of the  
50 cortex surface) for a final volume of 2 µl over 10 minutes. A round glass coverslip (diameter:

51 5mm) was then sealed on the adjacent bone and fixed to the skull by dental cement. Animals  
52 were observed until they fully recovered. The body weight and clinical status of mice were  
53 recorded every 2 days. Mice were sacrificed when they exhibited >20% reduction from initial  
54 body weight or significant neurological deficit. Mice were weekly treated with GDC-0152  
55 (SMg, intravenously, 20 mg/kg in solution in DMSO [24]). Treatment started 1 week after cell  
56 graft (Fig. S3). For immunofluorescences and clearing, mice were anesthetized, brains were  
57 extracted and fixed 24h in 4% paraformaldehyde at 4°C until use. For immunofluorescences,  
58 brains were cut in the coronal axis in 50 µm thick slices with a vibratome. For  
59 immunohistochemistry, brains were fixed with 4% formol, dehydrated and embedded in  
60 paraffine.

61 For two-photon imaging LysM-EGFP [55], CD11c-EYFP [56], and Thy1-CFP [57] (JAX stock  
62 #003710) mice were crossed to obtain triple transgenic mice [17]. Spheroids of GL261-DsRed  
63 cells were injected as previously described [17]. A Sephadex hemi-bead with diameter fitting  
64 with the dura-mater opening was inserted in the injection wound and glued using histo-  
65 compatible acrylic glue (Cyanolit). For immunofluorescences, mice were anesthetized, brains  
66 were extracted and fixed 4 h in paraformaldehyde 4% and then freeze until use.

### 67 **Whole mount stainings and Clearing**

68 Hemi brains were processed following the iDISCO+ protocol as previously described [58].  
69 Shortly, brains were dehydrated in successive methanol baths, put in a solution of 66%  
70 dichloromethane and bleached with 5% H<sub>2</sub>O<sub>2</sub>. Then samples were re-hydrated in sequential  
71 baths of methanol and permeabilized (PBS/0.2% TritonX-100/20% DMSO/0.3M glycine) at  
72 37°C for 2.5 days. Samples were the incubated in a blocking solution (PBS/0.2% TritonX-  
73 100/10% DMSO/3% Donkey Serum) at 37°C for 4.5 days and incubated for 5 days in primary  
74 antibodies solution (see Table S2; PBS-Tween 0.2% with heparin 10 mg/mL (PTwH)/5%  
75 DMSO/3% donkey serum) at 37°C for 5 days. After washing, samples were incubated with

76 secondary antibodies (see Table S2) in PTwH/3% donkey serum at 37°C for 5 days. Samples  
77 were finally dehydrated in successive baths of methanol and cleared in a BABB solution (33%  
78 Benzyl alcohol, 66% Benzyl benzoate) for 24 h and then with BABB alone until light sheet  
79 acquisition.

80 Tumoroids were cleared by using the MACS clearing kit according to the manufacturer protocol  
81 (Miltenyi Biotec).

## 82 **Two-photon imaging**

83 Images acquisition was conducted as reported [17] at D21 and D28 (Fig. S6). Briefly, prior to  
84 each imaging session, mice were anesthetized and injected intravenously with 100 µL of a  
85 quantum dots (QDots) solution (Qtracker™ 705 Vascular Labels, ThermoFisher, 6 µg/100 µL  
86 in phosphate saline buffer, Sigma Aldrich) and positioned on a stereotaxic frame allowing  
87 movements in the three-directions. Repositioning of the mice at D28 was realized using visual  
88 vascular landmarks.

89 We used a Zeiss LSM 780-MP two-photon microscope home modified to allow animal  
90 positioning below the 20X water immersion objective (1.0 NA) and coupled to a femtosecond  
91 pulsed infrared tunable laser (Chameleon Ultra 2, Coherent). Images were acquired using an  
92 excitation wavelength tuned at 920 nm to excite all fluorophores simultaneously. Signals were  
93 epicollected and separated by dichroic mirrors and filters on five independent non-descanned  
94 detectors. Gains and offsets were identical for all the detectors, except for the red channels  
95 whose gain was reduced by 30% to compensate for the strong expression of DsRed in tumor  
96 cells. Images were acquired below the dura matter over a depth of 500 µm using 10 µm steps.  
97 Laser power was linearly increased with depth. Z-stack images were acquired as mosaics  
98 (stitching mode) to cover the whole tumor surface.

## 99 **Immunostainings**

100 For immunofluorescences, a 2 h blockage of non-specific sites was firstly realized (bovine  
101 serum albumin 5%, goat serum 5%, donkey serum 5%, Triton 0.3%). Primary antibodies (Supp  
102 Table 1) were then incubated overnight at 4°C in PBS/BSA 5%/Triton 0.3%. Secondary  
103 antibodies (Supp Table 1) were incubated 1 h at room temperature with Hoechst. Slices were  
104 incubated with copper sulfate/ammonium chloride for 10 min and then slices were mounted  
105 with Prolong Mounting Medium (Sigma-Aldrich). Acquisitions were performed with a Zeiss  
106 LSM700 or LSM780 confocal microscope.

107 CD31 immunohistochemistry was performed by using a benchmark automate (Ventana, Roche)  
108 as previously described[24]. Stained slices were scanned with a Hamamatsu Nanozoomer and  
109 visualized with the NDP.view2 software. Ten areas of the tumors were analyzed at the objective  
110 20x. Size of the larger diameter of vessels was manually drawn and number of vessels was  
111 counted.

### 112 **Protein extraction and western blotting**

113 Western blots were performed as previously described[24]. Proteins were extracted with RIPA  
114 lysis buffer supplemented with proteases and phosphatases inhibitors for 30 minutes (Thermo  
115 Scientific) on ice followed by 10 minutes centrifugation at 12000rpm. Protein concentration  
116 was assayed using bicinchoninic acid (MicroBCA kit, Pierce, Rockford, IL, USA). Eighty  
117 micrograms of proteins per lane were separated by 12% (for IAP proteins detection) or 4-20%  
118 (for cell signaling pathway proteins) Mini-PROTEAN® TGX™ Precast Gels (Biorad). Proteins  
119 were transferred onto nitrocellulose membranes (Novex) using wet transfer system (Biorad) at  
120 100V for 1 h. After 1 h of blocking in 5% skimmed milk and 3 washes with TBS Tween 0.1%  
121 (TBST, Sigma-Aldrich), membranes were incubated with the antibodies (see table 1) in TBST  
122 supplemented with 5% BSA (Sigma-Aldrich) overnight at 4°C under shaking. The following  
123 horseradish peroxidase-conjugated donkey anti-mouse IgG, goat anti-rabbit IgG (Santa Cruz  
124 Biotechnology) antibodies and ECL (Bio-Rad) were used for proteins detection.

125 Quantifications were performed using ImageJ software (National Institutes of Health, Bethesda,  
126 MD, USA) on preflashed X-ray films. Data presented were standardized on  $\beta$ -actin expression  
127 and for phospho-proteins, quantifications are represented by phospho-protein/total-protein  
128 ratio. The original western blots are presented in Fig. S11 and Fig. S12.

### 129 **Cell viability assay**

130 Cell viability was evaluated by assessing cell metabolic capacity using the MTT method (3-  
131 (4,5-dimethylthiazol-2-yl)-diphenyl tetrazolium bromide; Sigma-Aldrich). Cells were treated  
132 with serial concentrations of SMg (0.1, 1, 10, 25, 50, 100, 150, 200, 500  $\mu$ M). After treatment,  
133 MTT reagent was added and incubated for 4 h at 37 °C. The reduced formazan was dissolved  
134 with DMSO and absorbance was measured at 562 nm with an Elx800 microplate reader (Bio-  
135 Tek, Colmar, France) and data were analyzed with Gen5 1.09 software (Bio-Tek).

### 136 **TCGA analyses**

137 Transcriptomic data using Affymetrix Human Genome U133A Array were extracted from the  
138 open access Cancer Genome Atlas (TCGA) database[59]. The data of 357 patients with primary  
139 tumor diagnosed as Glioblastoma, *IDH*-wt were analyzed using the GlioVis data portal[60] to  
140 determine the prognostic value of the mRNA expression of the following genes: *CD14*, *CCL17*  
141 and *SALL1*. Data of BIRC3 and P2RY13 mRNA expression were also extracted to be analyzed  
142 as ratios (BIRC3/P2RY13).

### 143 **Supplementary Figures S1 to S12**

144 **Fig. S1. Experimental workflow from human GB samples.**

145 **Fig. S2. Effect of IAP inhibition on human immune cells.**

146 **(A)** Immunofluorescence of labeled CD45<sup>+</sup> cells (green) and nuclei (Hoechst, blue) after CD45  
147 immunomagnetic cell sorting from human GB samples (scale bar=100  $\mu$ m). **(B)** Histograms  
148 representing the purity of the CD45 cultures isolated from human GB samples 7 days after

149 sorting. One representative experiment out of 6 is shown. (C) Graphs representing  
150 quantification of cytokines/chemokines differentially expressed in the supernatant of vehicle  
151 and SMg-treated (1  $\mu$ M) CD45 cultures. (D) Survival curve obtained from TCGA databases of  
152 GB patients showing correlation between *CD14* and *CCL17* expression and patient overall  
153 survival. (E) One representative fluorescent activated cell sorting experiment out of 4  
154 illustrating the TMEM119 cell sorting.

155 **Fig. S3. IAP inhibition affects TAM-MG function.**

156 (A) Viability assay of GL261-DsRed spheroids upon SMg treatment (n= 3). (B) Viability assay  
157 of CT2A spheroids upon SMg treatment (n= 3). (C) MTT viability assay of C8B4 cells upon  
158 SMg treatment (n=2). (D) Quantification of IAP expression levels in C8B4 microglia cell line  
159 after 72h of vehicle or SMg treatment from 3 independent experiments. ImageJ software was  
160 used. Data presented were normalized to actin  $\beta$  expression. (E) Quantification of CT2A  
161 spheroids area upon ZVAD pre-treatment + vehicle (n=33), ZVAD pre-treatment + SMg  
162 (n=29), TNF $\alpha$  pre-treatment + vehicle (n=32), TNF $\alpha$  pre-treatment + SMg (n=35) and in the  
163 presence (vehicle, n=32; SMg, n=34) or absence of the C8B4 cells (vehicle, n=48; SMg, n=48).  
164 The spheroids sizes were normalized to the size measured after 24 h. Statistical analyses were  
165 performed by using ANOVA test and ANOVA post-hoc Tukey test; alpha=0.05, bilateral p-  
166 value: \*\* = p<0.005.; \*\*\*\*=p<0.0001. (F) Quantification of GL261-DsRed spheroids area  
167 (mm<sup>2</sup>) upon vehicle (n=5) and SMg treatment (n=6) and with or without conditioned medium  
168 upon vehicle (n=5) and SMg treatment (n=5). Statistical analyses were performed by using  
169 ANOVA test; alpha=0.05. (G) Representative western blot of ML-IAP expression in siCTRL  
170 and siML-IAP C8B4 cells after 24h of siRNA treatment. ML-IAP expression was analyzed by  
171 western blotting Expression level of Actin  $\beta$  served as loading control. (H) Quantification of  
172 GL261-DsRed spheroids area (mm<sup>2</sup>) upon vehicle (n=5) and SMg treatment (n= 6) and with or  
173 without conditioned medium upon vehicle (n=5) and SMg treatment (n= 5). C8B4 cells were

174 pretreated for 24h with ZVAD. Statistical analyses were performed by using ANOVA test;  
175  $\alpha = 0.05$ . Statistical analyses were performed by using ANOVA test;  $\alpha=0.05$ .

176 **A, B, C, D, E, F, H** Bar graphs represent mean  $\pm$  s.e.m.

177 **Fig. S4. Experimental workflow of the experiments performed by using a syngeneic**  
178 **glioma mouse model.**

179 **Fig. S5. SMg decreases tumor growth and promotes immune infiltration.**

180 **(A)** Representative 3D reconstitution of cleared hemi-brains at 15, 21 and 28 days-post tumor  
181 graft (D15, D21 and D28) in vehicle (n=11) and SMg-treated (n=10) mice. Tumor cells were  
182 labelled with an anti-RFP antibody (Red) and brains were outlined in white (scale bar =  
183 2000 $\mu$ m). **(B)** Tumor area for vehicle (D15 n= 4, D21 n= 3 and D28 n=4) and SMg (D15 n= 4,  
184 D21 n= 4 and D28 n=3) condition. Statistical analyses were performed by using Mann-  
185 Whithney test;  $\alpha = 0.05$ , bilateral p-value:  $\square$ : p=0.057. **(C)** Tumor area representing the  
186 growth of tumors in vehicle (n=6) and SMg-treated mice (n= 6) followed at D15, D21 and D28  
187 with epifluorescence microscopy. Statistical analyses were performed by using Mann-  
188 Whithney test;  $\alpha = 0.05$ , bilateral p-value: \*: p<0.05. **(D)** Two-photon images of D21 and  
189 D28 GL261-DsRed tumors (scale bar = 300  $\mu$ m). Representative images are shown. **(E)**  
190 Illustration of the 4 layers representing the distance from tumor center (from tumor center: 0-  
191 25%, 25-50%,50-75% and 75-100%). Tumor border is outlined in green (scale bar=500  $\mu$ m).  
192 **(F)** Histogram count plots representing the repartition curve of CD45<sup>+</sup> cell quantity (y-axis)  
193 from tumor center (0 on the x-axis) to tumor border (right extremity on the x-axis) of D28  
194 vehicle and SMg-treated tumors. Dotted blue line shows CD45<sup>+</sup> cells distribution in number of  
195 spots, dashed blue line represents random distribution and red lines represent attraction  
196 distance.

197 **B, C** Bar graphs represent mean  $\pm$  s.e.m.

198 **A, D, E** 3D reconstitution and image analyses were performed by using Imaris software.



199 **Fig. S6. IAP inhibition remodels tumor vasculature.**

200 **(A)** Two-photon images of vessels (white) and tumor (red) in vehicle and SMg-treated mice at  
201 D21 and D28 (scale bar, D21=200  $\mu\text{m}$ ; D28=300  $\mu\text{m}$ ). White dotted squares identify zoomed  
202 areas. **(B)** Scatter plot representing vessel area at D28 in vehicle (n=9) and SMg (n=3) treated  
203 tumors. Statistical analyses were performed with Mann-Whitney test; alpha=0.05, bilateral p-  
204 value: \*:<0.05; \*\*: p<0.005. **(C)** CD31 immunolabeling of formalin fixed paraffin embedded  
205 tumor slices (scale bar=250  $\mu\text{m}$ ). Representative images are shown. A higher magnification is  
206 presented in the lower panel. **(D)** Scatter plot representing vessels area and the number of  
207 vessels at D28 in vehicle (n= 11) and SMg (n= 10) treated tumors. Statistical analyses were  
208 performed by using Mann-Whitney test; alpha = 0.05, bilateral p-value: ns: p> 0.05, bilateral  
209 p-value: \*\*\*\*: p< 0.0001. **(E)** 3D reconstitutions of cleared hemi-brains at D15, D21 and D28  
210 in vehicle (n= 11) and SMg-treated (n=10) mice, vessels are represented in white (scale bar=50  
211  $\mu\text{m}$ ). A 4X zoom was applied. Representative images are shown.  
212 **A, E** 3D reconstitutions and image analyses were performed by using Imaris software.  
213 **B, D** Bar graphs represent mean  $\pm$  s.e.m.

214 **Fig. S7. SMg modifies the sphericity and the cell surface area of the TAMs.**

215 **(A)** Confocal images of EGFP<sup>+</sup> (green) and Ly6G<sup>+</sup> (purple) cells in vehicle and SMg treated  
216 tumors at D28. GL261-DsRed tumor cells are in red (scale bar=100  $\mu\text{m}$ ). Representative images  
217 are shown. **(B)** Quantification of EGFP<sup>+</sup>/Ly6G<sup>+</sup> cells in vehicle (n=5) and SMg (n=6) treated  
218 tumors at D28. Bar graphs represent mean  $\pm$  s.e.m. Statistical analyses were performed with  
219 Mann-Whitney test; alpha = 0.05. **(C)** Two-photon images representing cells with high (0.900)  
220 and low (0.600) sphericity scores related to vessels (white). Scale bar=10 $\mu\text{m}$ . **(D)** Scatter plot  
221 representing the distance from vessels (x-axis,  $\mu\text{m}$ ) in function of the morphology represented  
222 by a sphericity score (y-axis, score from 1=Round, 0 = not round) at D21 (EGFP<sup>+</sup>: vehicle  
223 n=5152, SMg n=1058; EYFP<sup>+</sup>: vehicle n=6920; SMg n=2481; LysM-EGFP<sup>+</sup>/CD11c-EYFP<sup>+</sup>

224 :vehicle n=1332, SMg n=547) and D28 (EGFP<sup>+</sup>: vehicle n=15268, SMg n=14398; EYFP<sup>+</sup>:  
225 vehicle n=11483, SMg n = 7194; EGFP<sup>+</sup>/ EYFP<sup>+</sup>: vehicle n=4267, SMg n=4581). Each dot  
226 represents a cell. Linear regressions are represented for each graph. **(E)** Scatter plot representing  
227 the distance from vessels (x-axis,  $\mu\text{m}$ ) in function of the area (y-axis,  $\mu\text{m}^2$ ) at D21 (EGFP<sup>+</sup>:  
228 vehicle n=5152; SMg n=1058; EYFP<sup>+</sup>: vehicle n=6920; SMg n=2481; EGFP<sup>+</sup>/EYFP<sup>+</sup>: vehicle  
229 n=1332 ; SMg n=547) and D28 (EGFP<sup>+</sup>: vehicle n=15268, SMg n=14398; EYFP<sup>+</sup>: vehicle  
230 n=11483 ; SMg n=7194; EGFP<sup>+</sup>/EYFP<sup>+</sup>: vehicle n=4267, SMg n=4581). Each dot represents a  
231 cell. Linear regressions are represented for each graph.

232 **C, D, E** 3D reconstitution and image analyses were performed by using Imaris software.

### 233 **Fig. S8. SMg reprograms GB immune landscape.**

234 **(A)** Multivariate data analysis by SIMCA of all the 5 experiments of vehicle (D21 n= 22, D28  
235 n= 4) SMg-treated (D21 n= 23, D28 n=6) mice. **(B)** Proportional sizes of the respective immune  
236 cell clusters projected onto a *t*-SNE map. **(C)** Heat map of the different immune cell clusters  
237 projected onto a *t*-SNE map of vehicle and SMg-treated tumors of the other experiment  
238 performed at D21. **(D)** Pie charts demonstrating the distribution of the identified immune cell  
239 types across conditions of the D. **(E)** Heat map of the different immune cell clusters projected  
240 onto a *t*-SNE map of vehicle and SMg-treated tumors of Exp A at D28. **(F)** Pie charts  
241 demonstrating the distribution of the identified immune cell types across conditions of the E.  
242 **(G)** Percentage of basal and active TAM-MG expressing PD1 among the CD45<sup>+</sup> cells at D21  
243 (basal TAM-MG n=3; active TAM-MG n=3) and D28 (basal TAM-MG n=5; active TAM-MG  
244 n=5). Vehicle and SMg treatments were pooled. Bar graphs represent mean  $\pm$  s.e.m. Statistical  
245 analyses were performed by using Mann-Whitney test; alpha = 0.05, bilateral p-value:  
246 \*\*= $p < 0.005$ .

### 247 **Fig S9. Images processing pipeline.**

### 248 **Fig S10. Tumor segmentation based on 488 wavelength contrast.**

249 **Fig S11. Original western blots of Fig. 1 and 3. (A)** Western blots corresponding to the Fig.  
250 1 A. **(B)** Western blots corresponding to the Fig. 3 A. **(C)** Western blots corresponding to the  
251 Fig. 3 F-H.

252 **Fig S12. Original western blots of Fig. S.3. (A)** ML-IAP expression. **(B)** Actin $\beta$  expression.

253

254

255

256

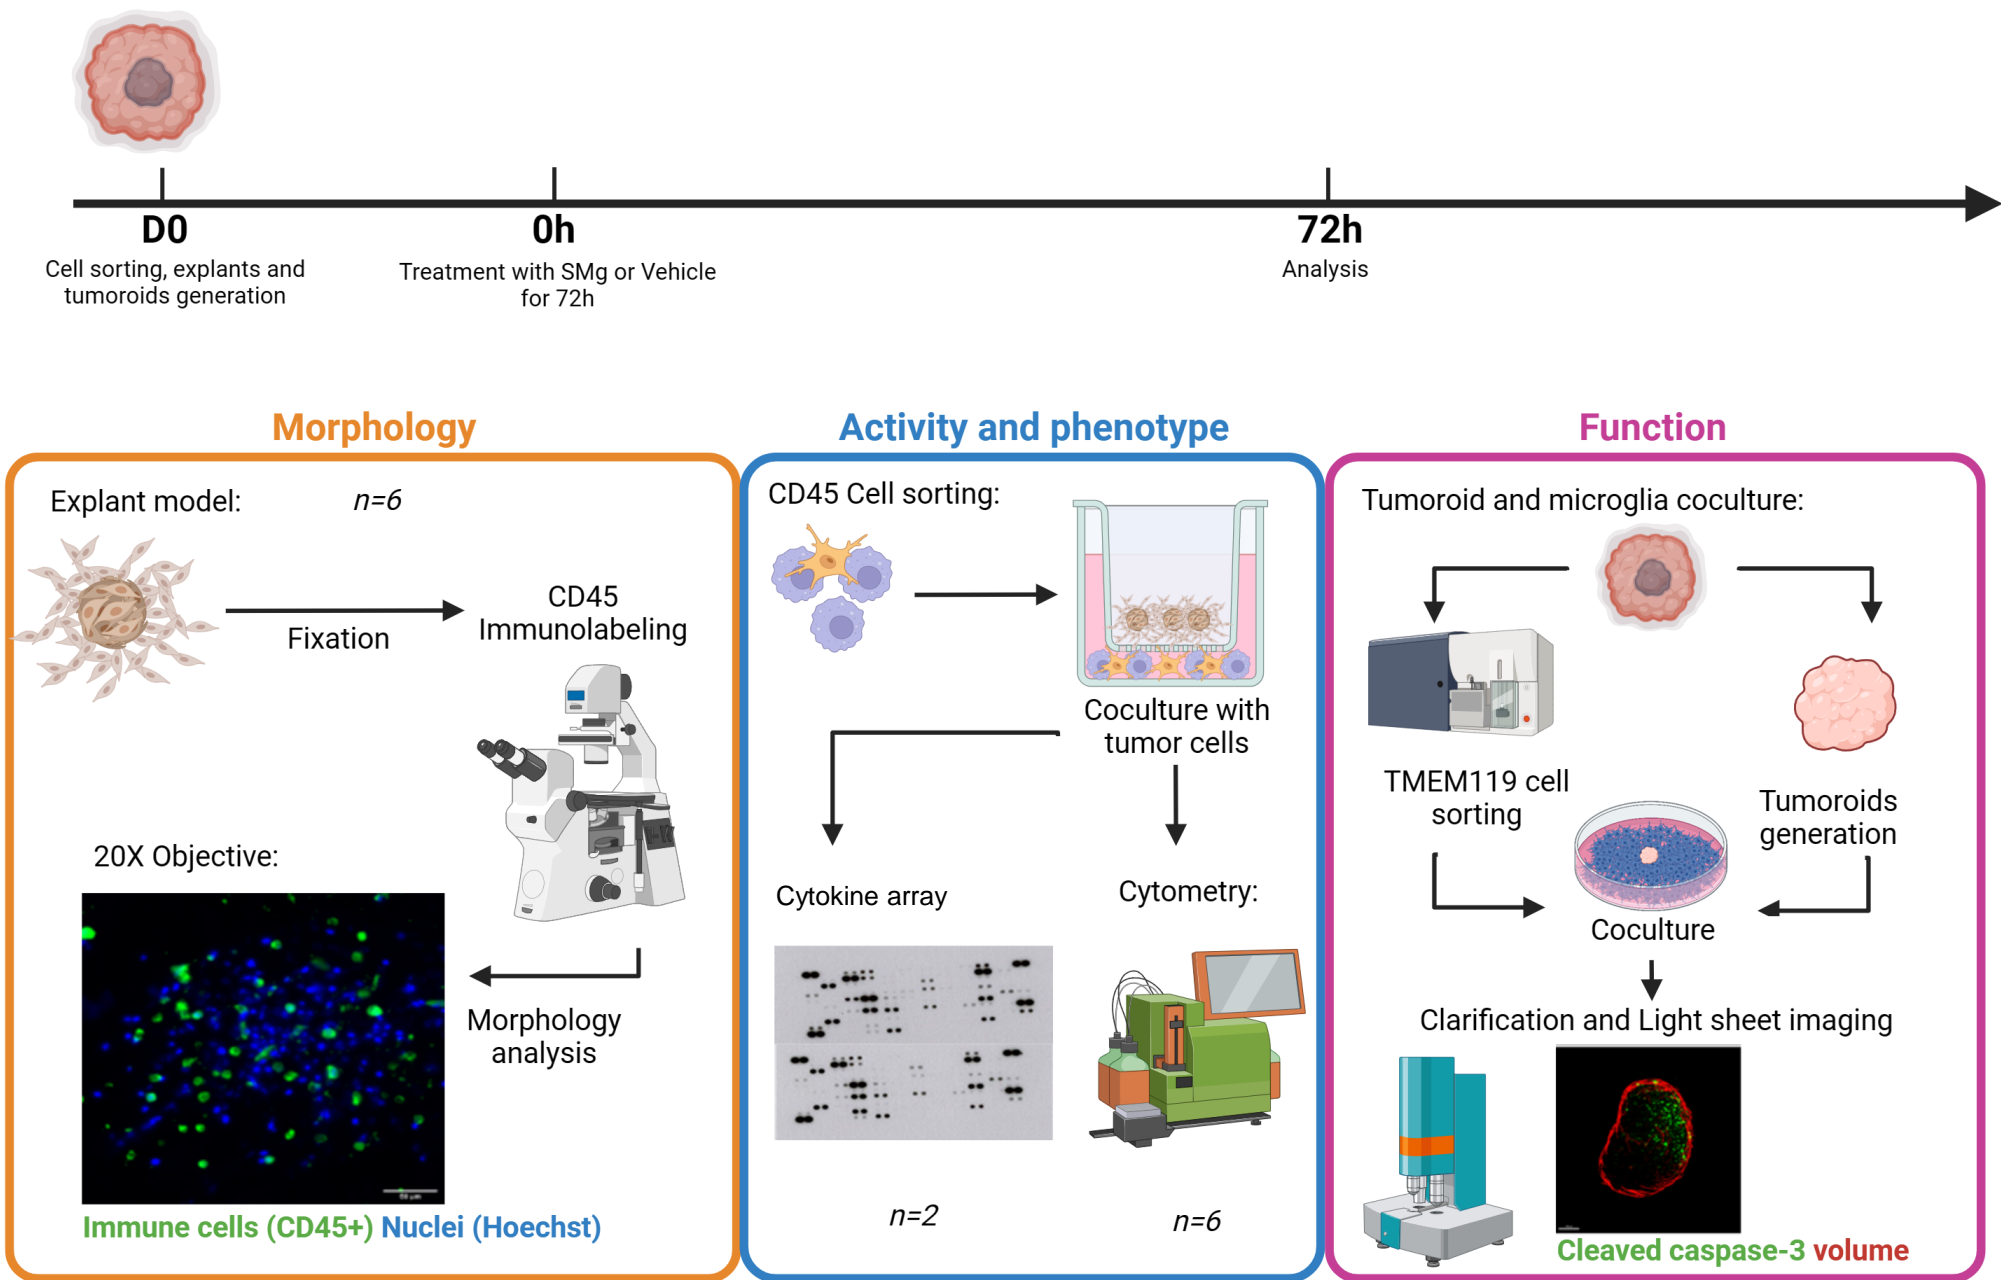

Fig. S1. Experimental workflow from human GB models.

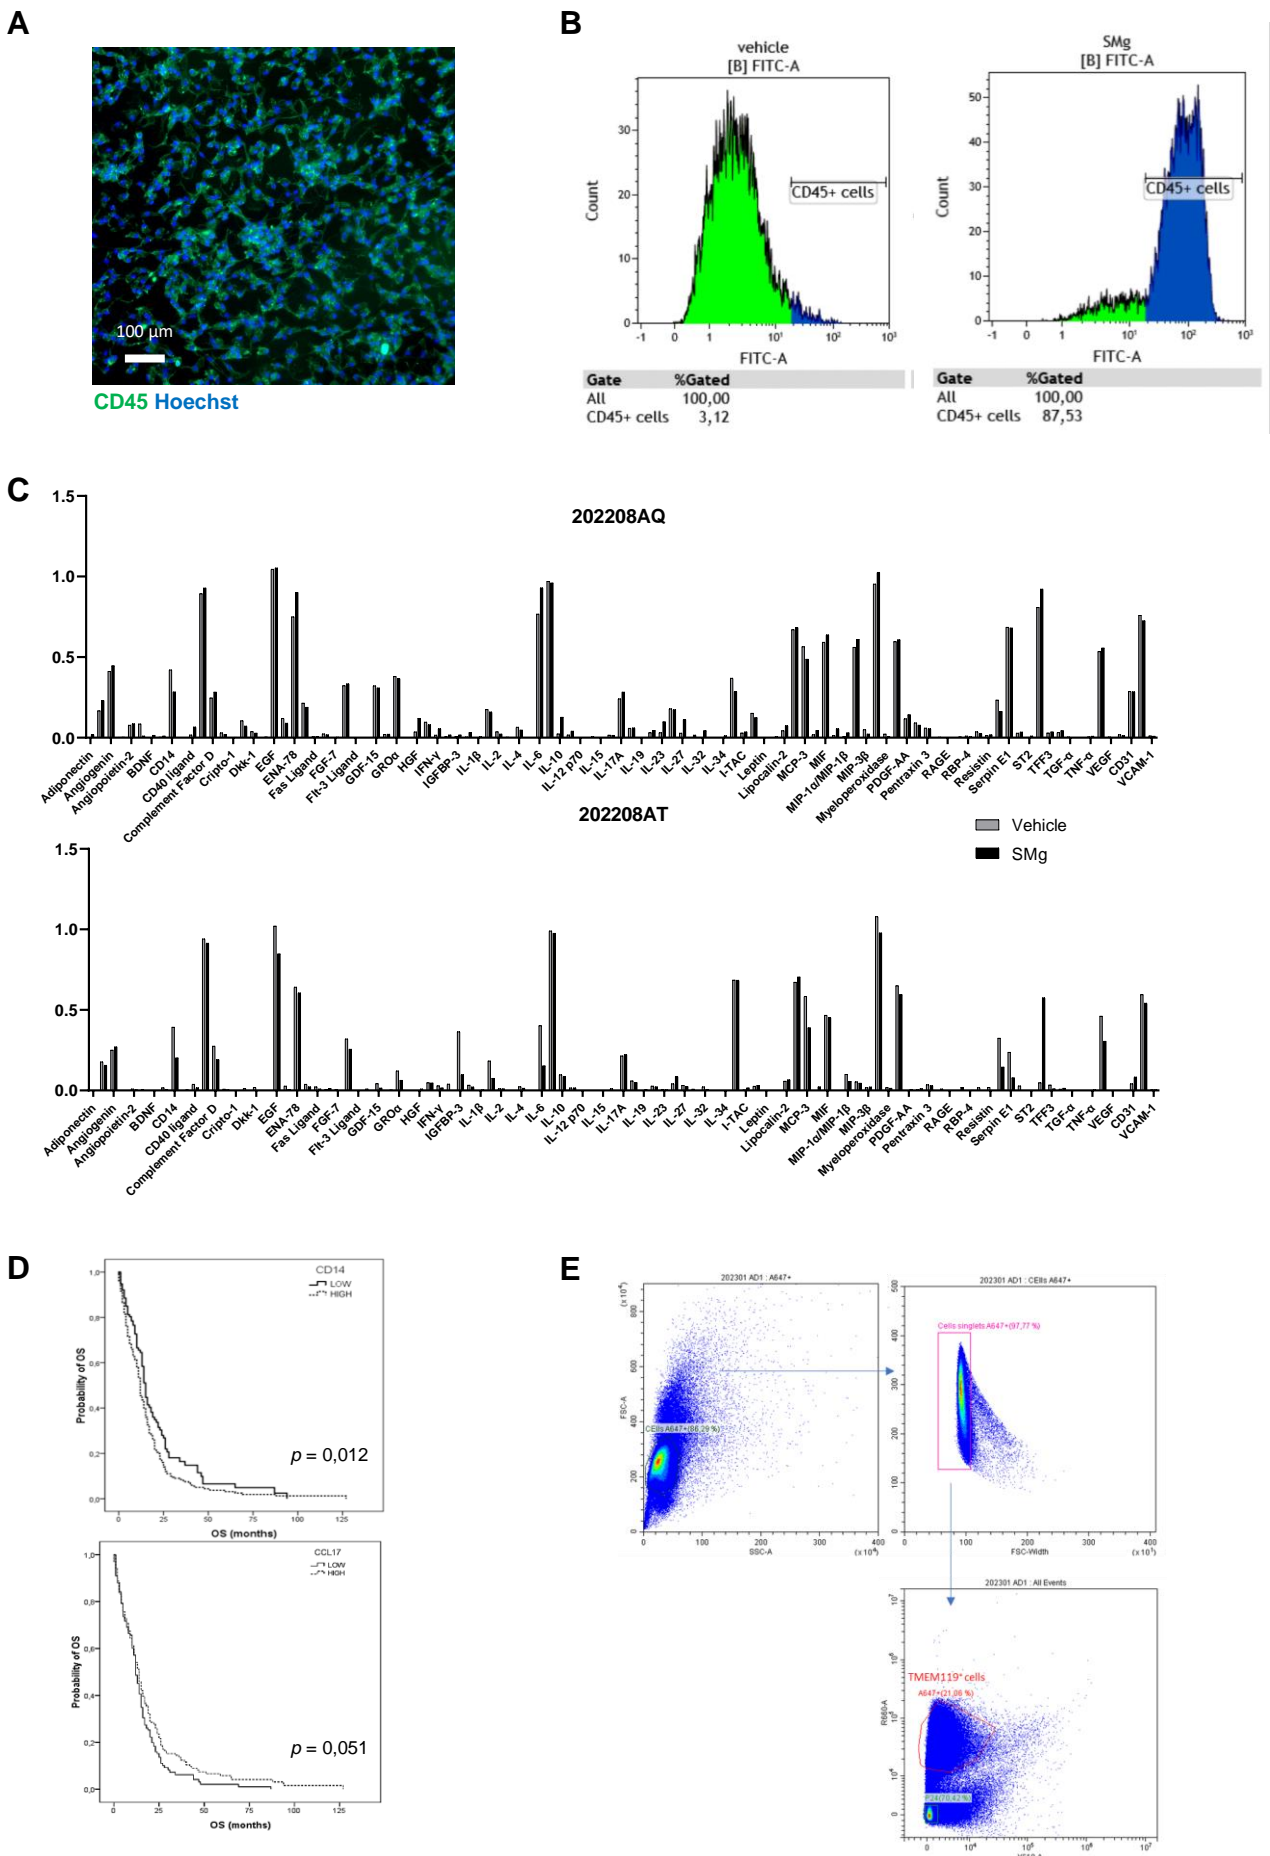

Fig. S2. Effect of IAP inhibition on human immune cells.

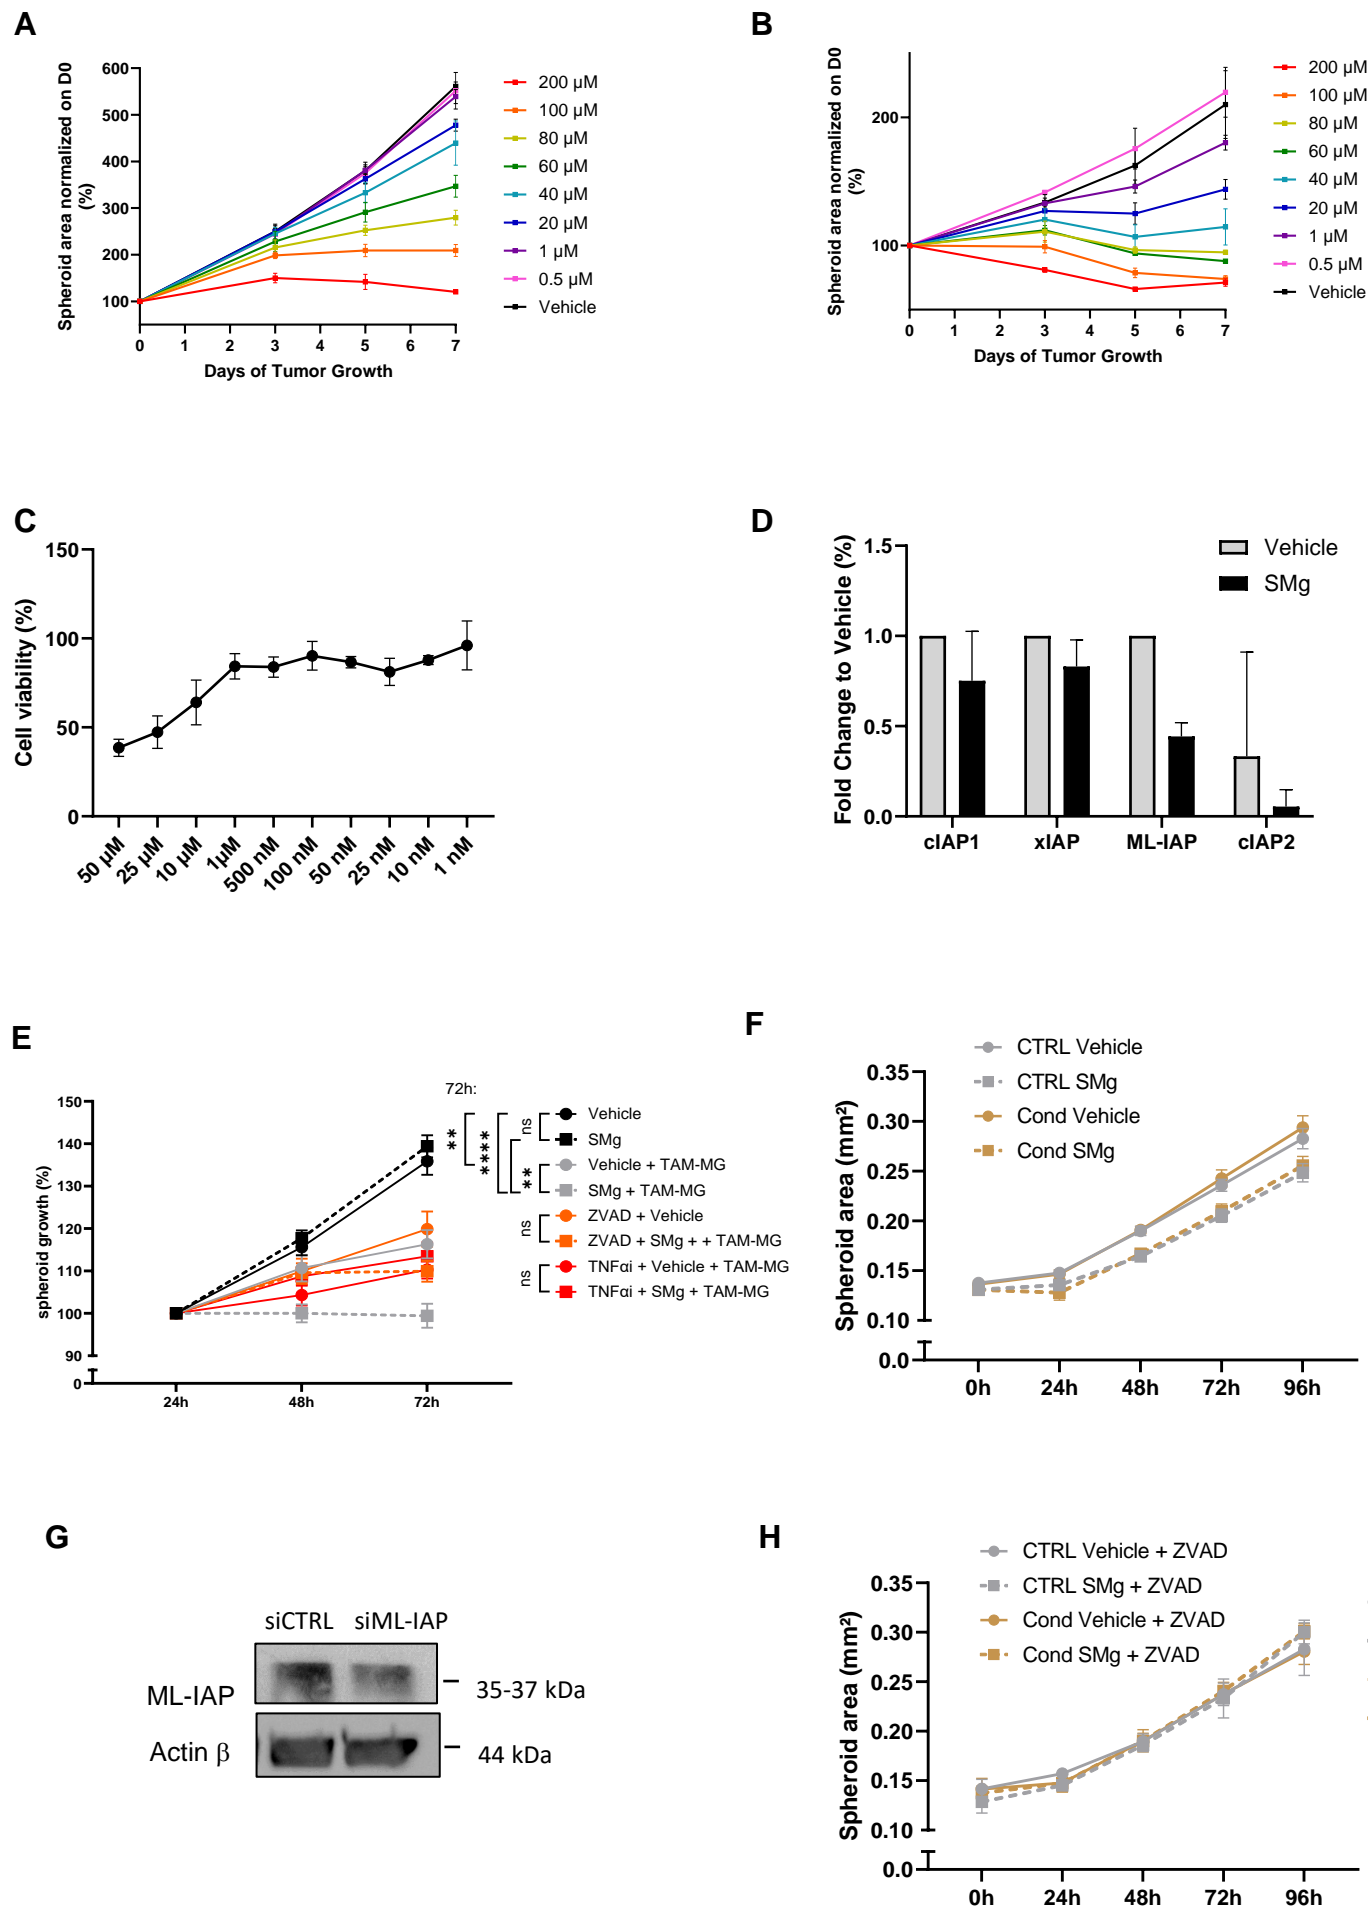

**Fig. S3. IAP inhibition affects TAM-MG function.**

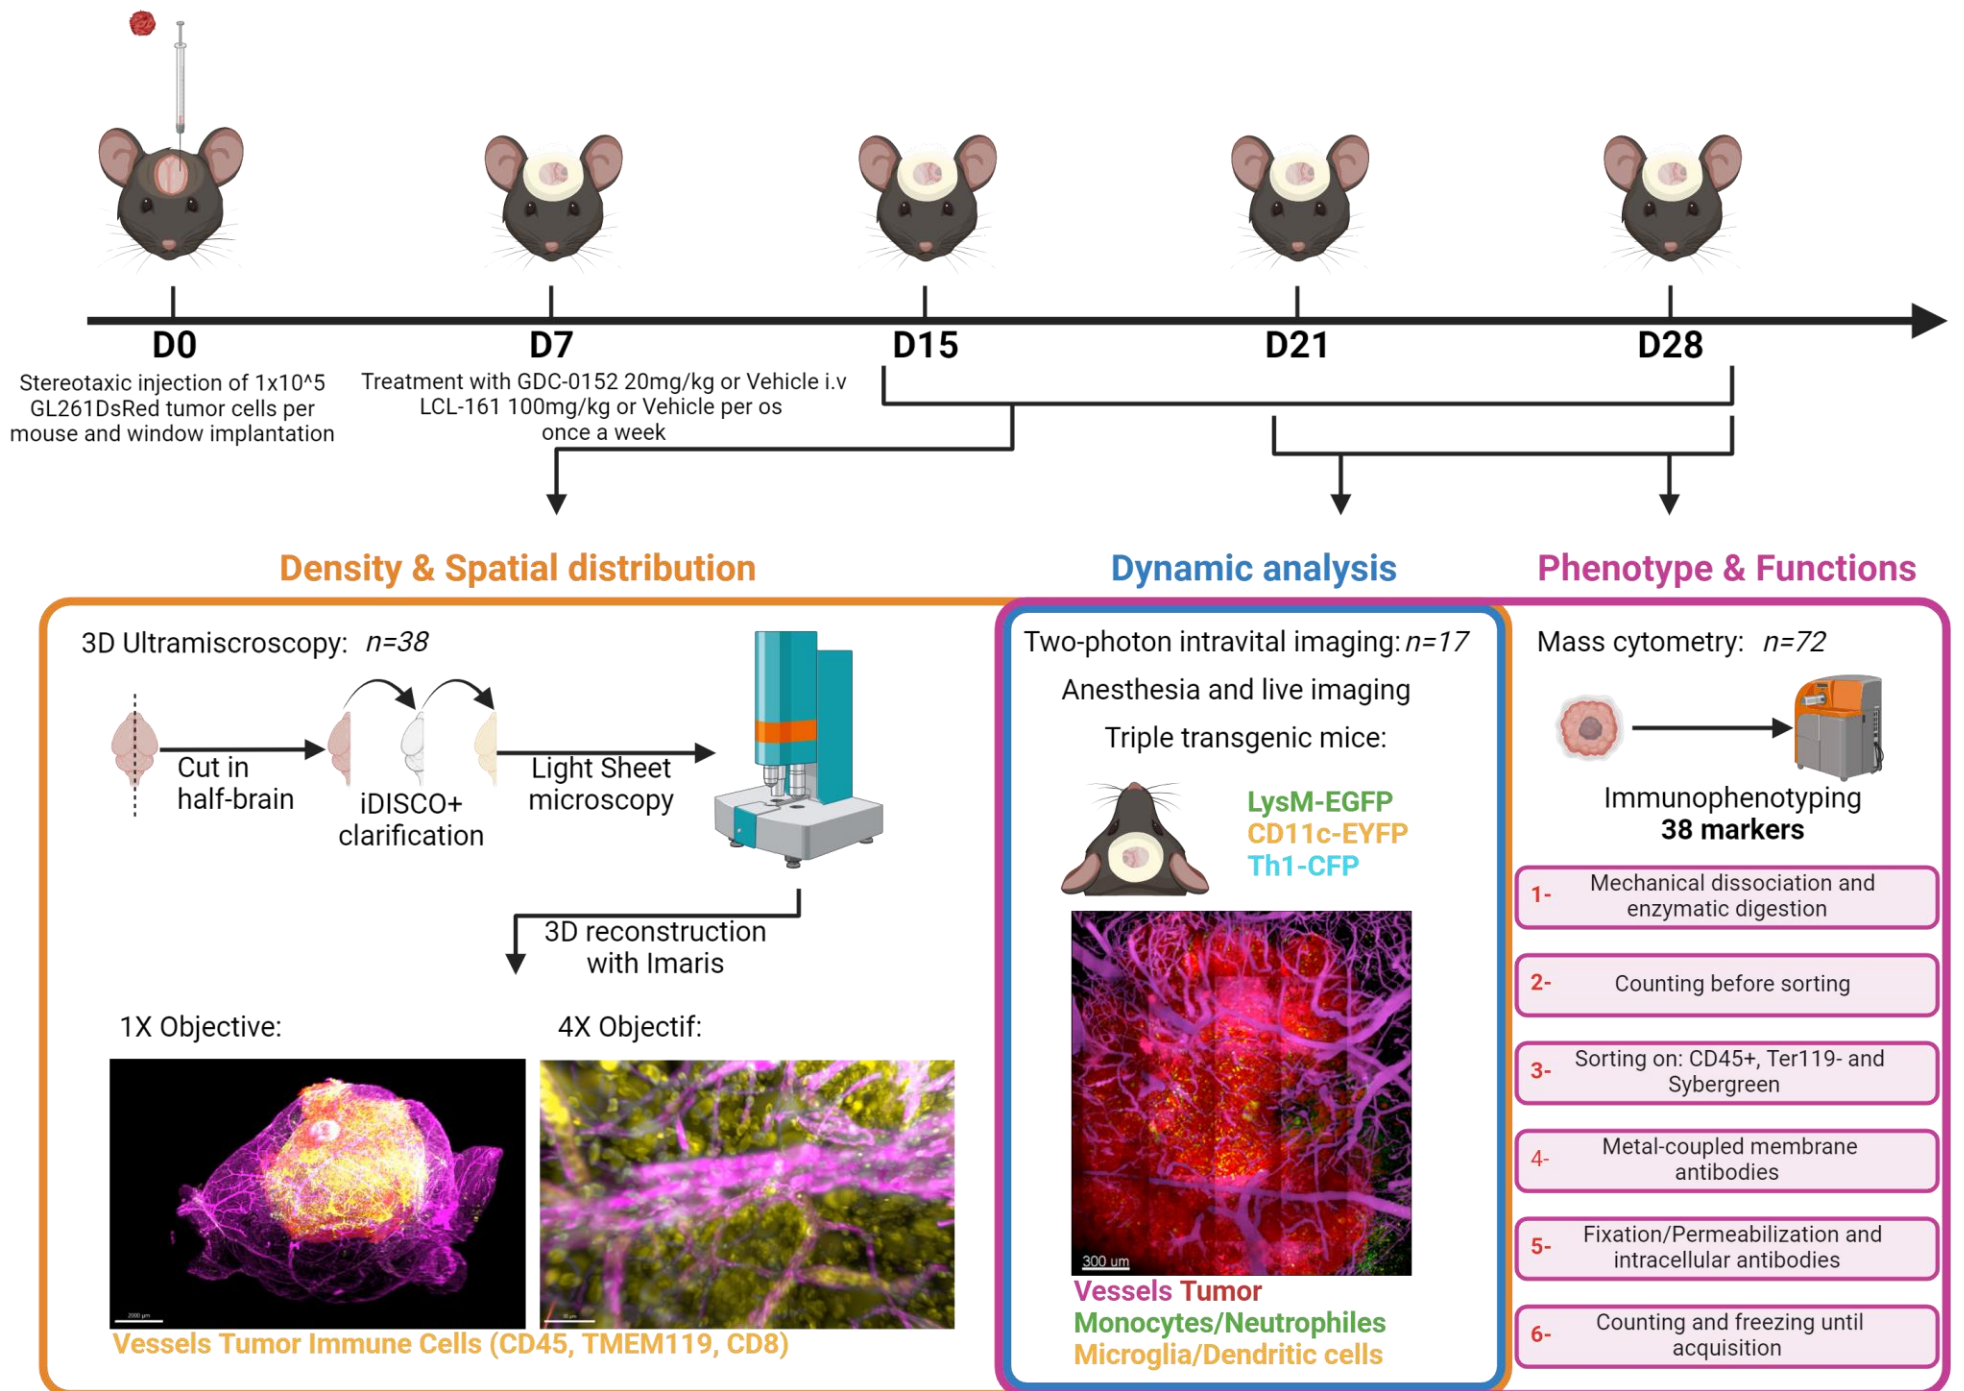

Fig. S4. Experimental workflow of the experiments performed by using a syngeneic glioma mouse model.

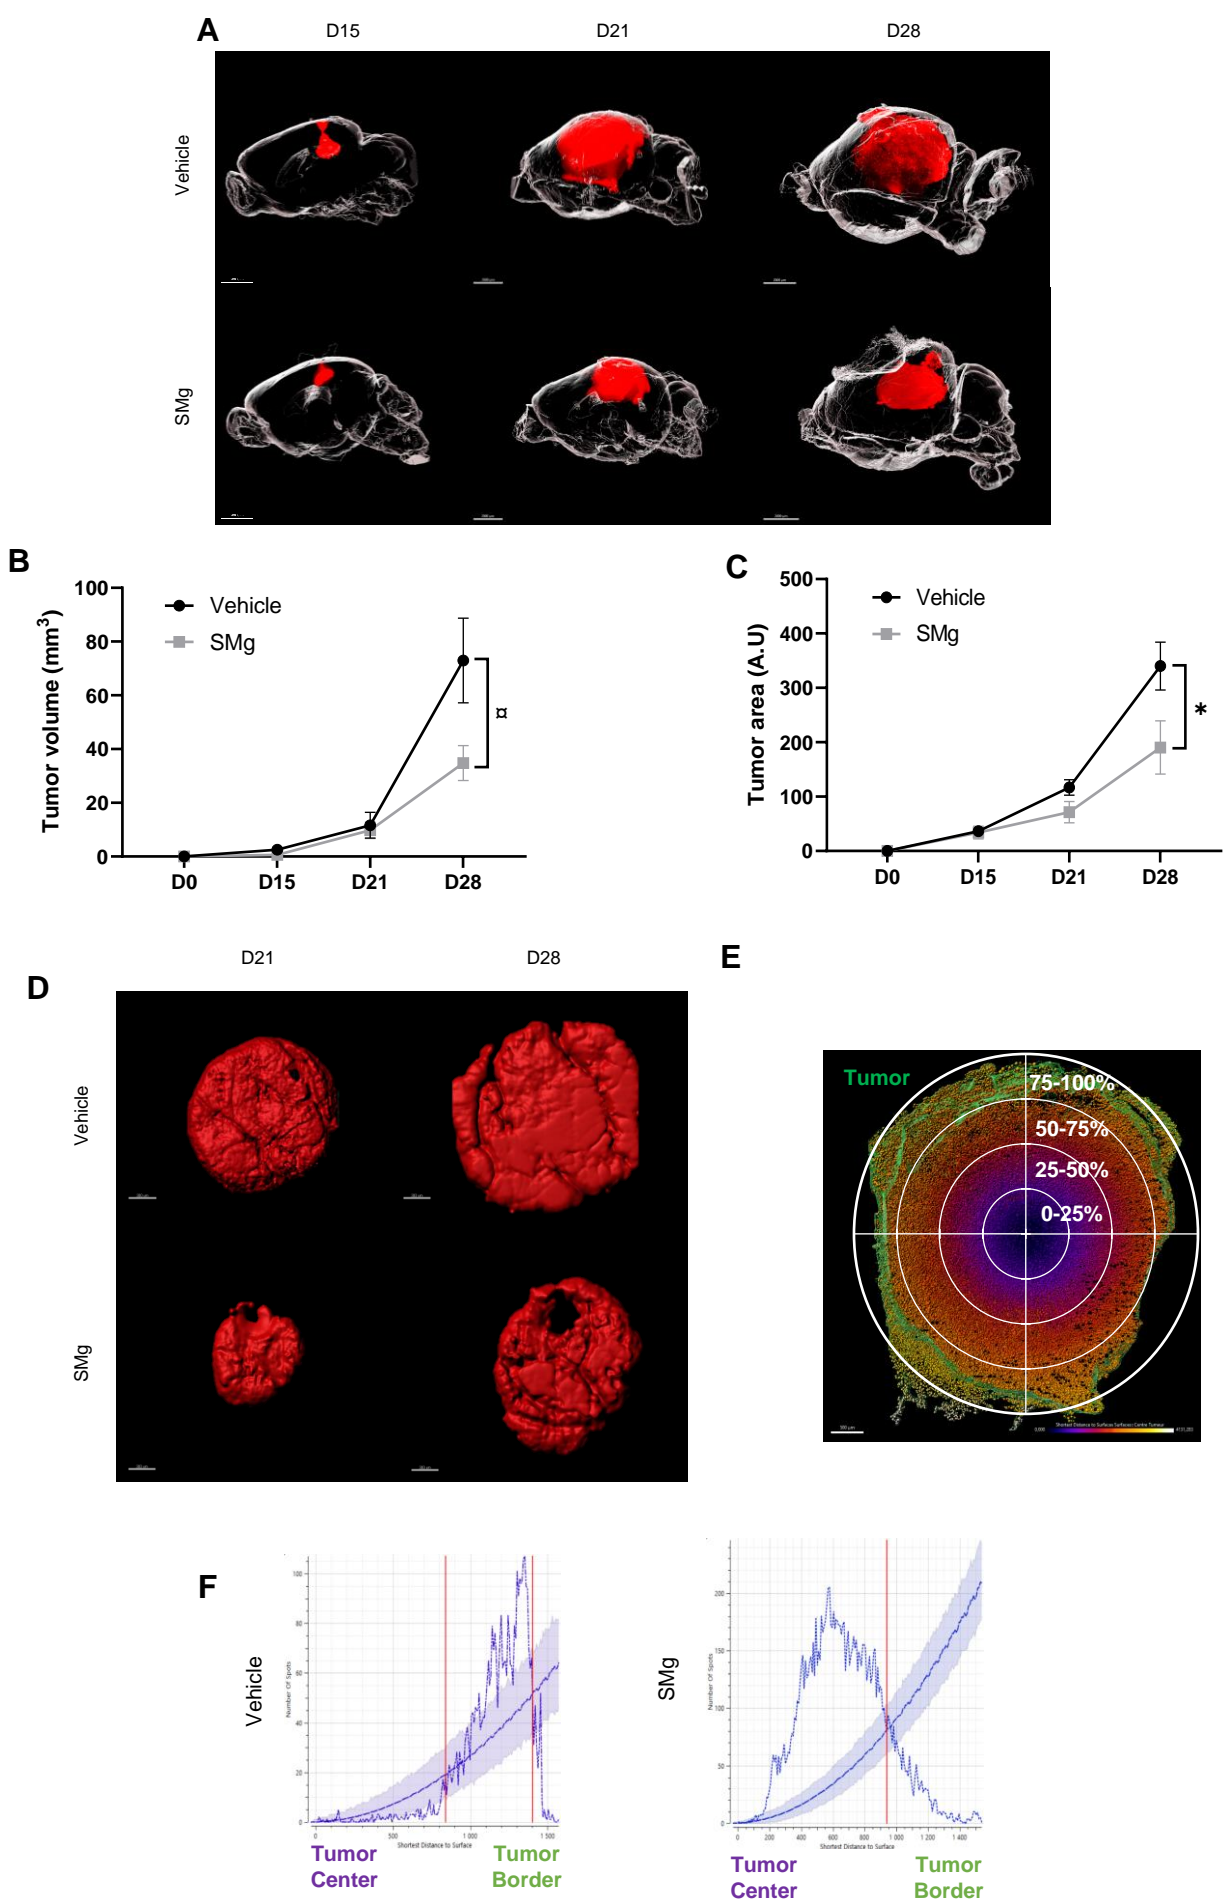

**Fig. S5. SMg decreases tumor growth and promotes immune infiltration.**



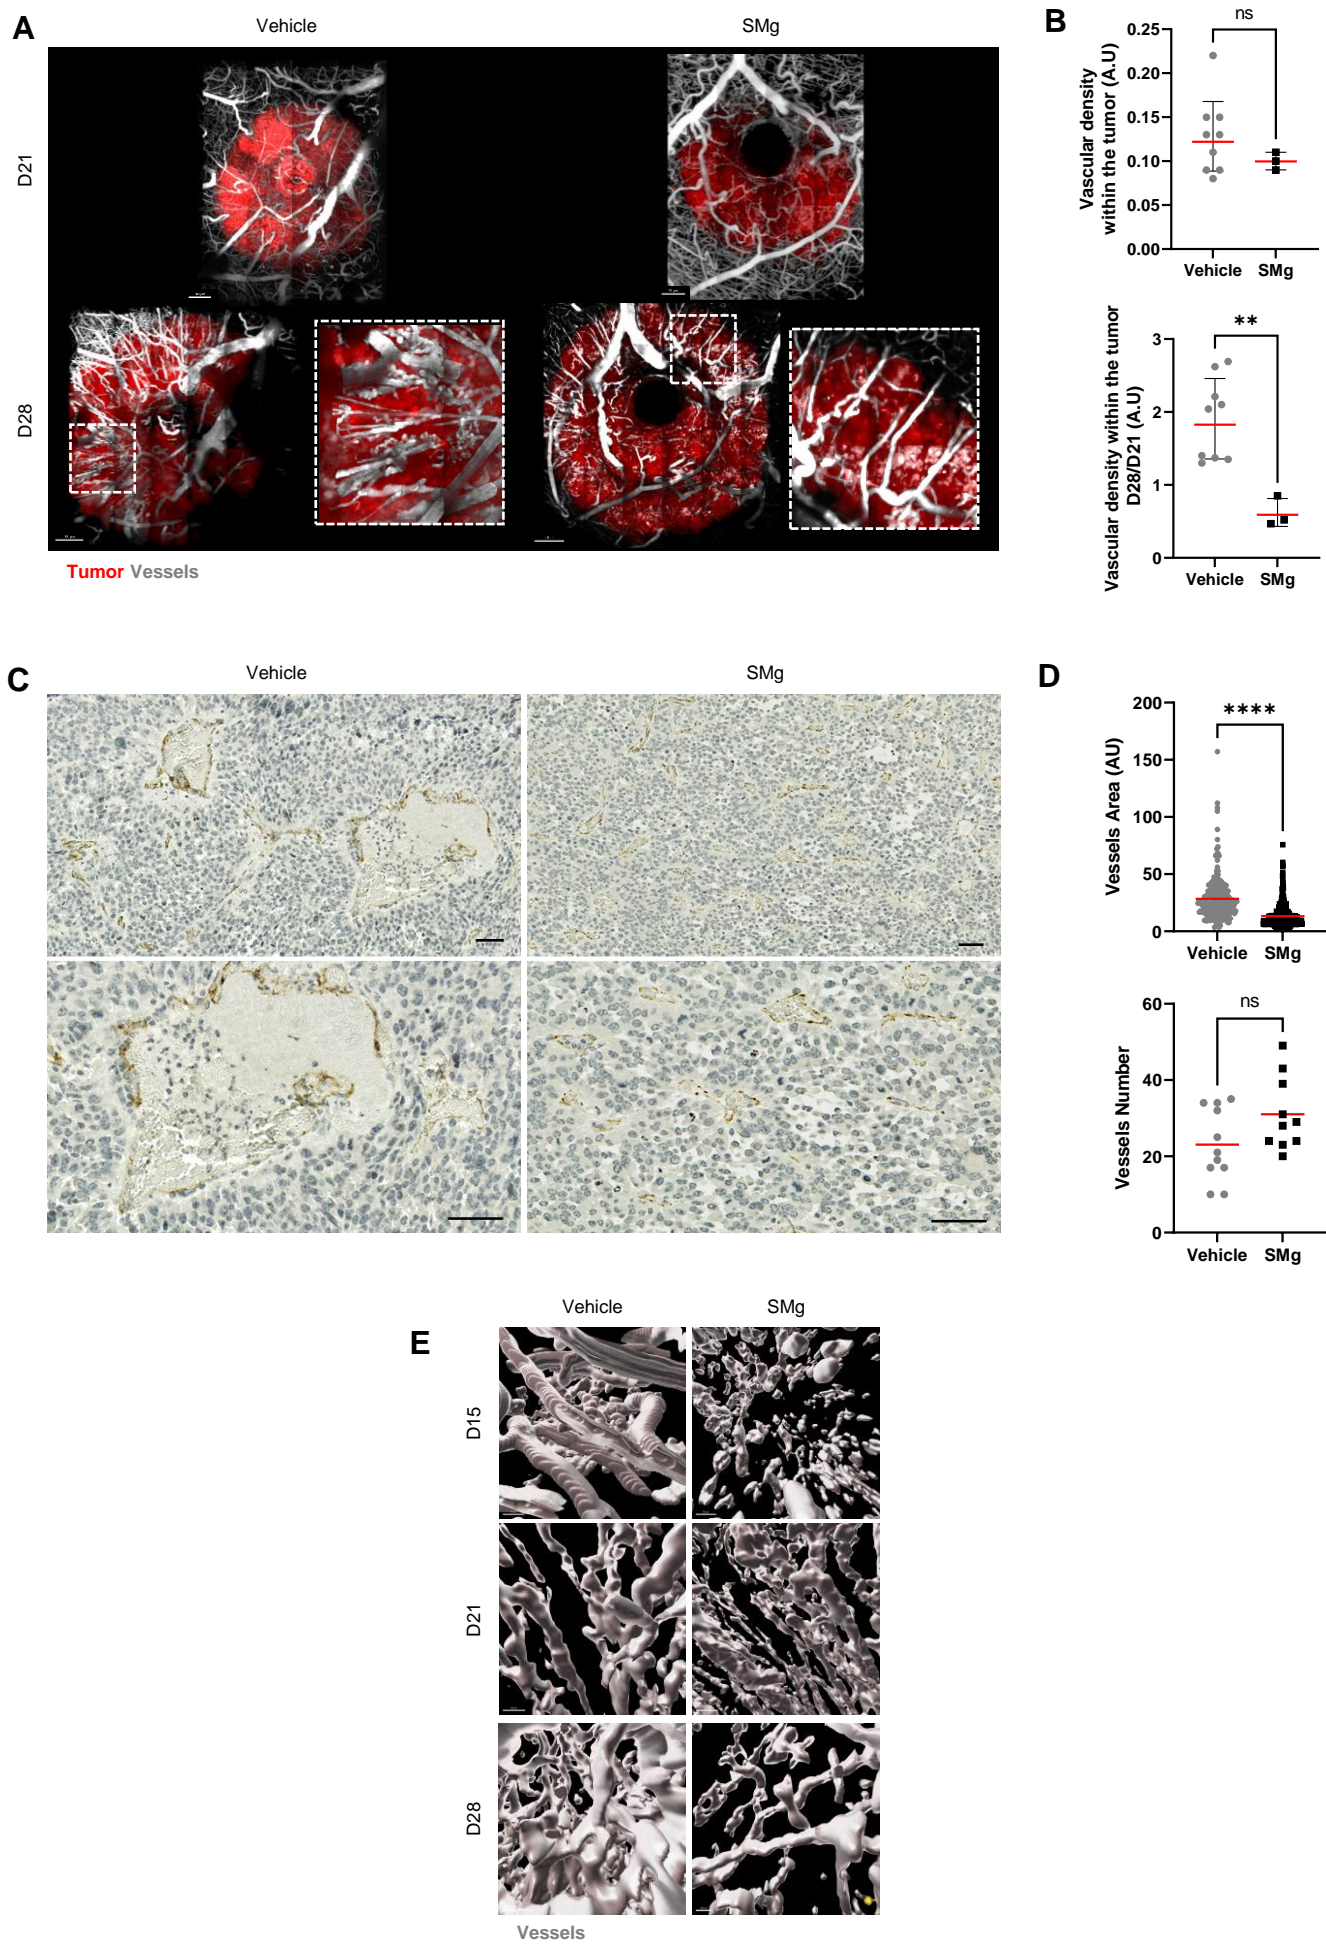

**Fig. S6. IAP inhibition remodels tumor vasculature.**

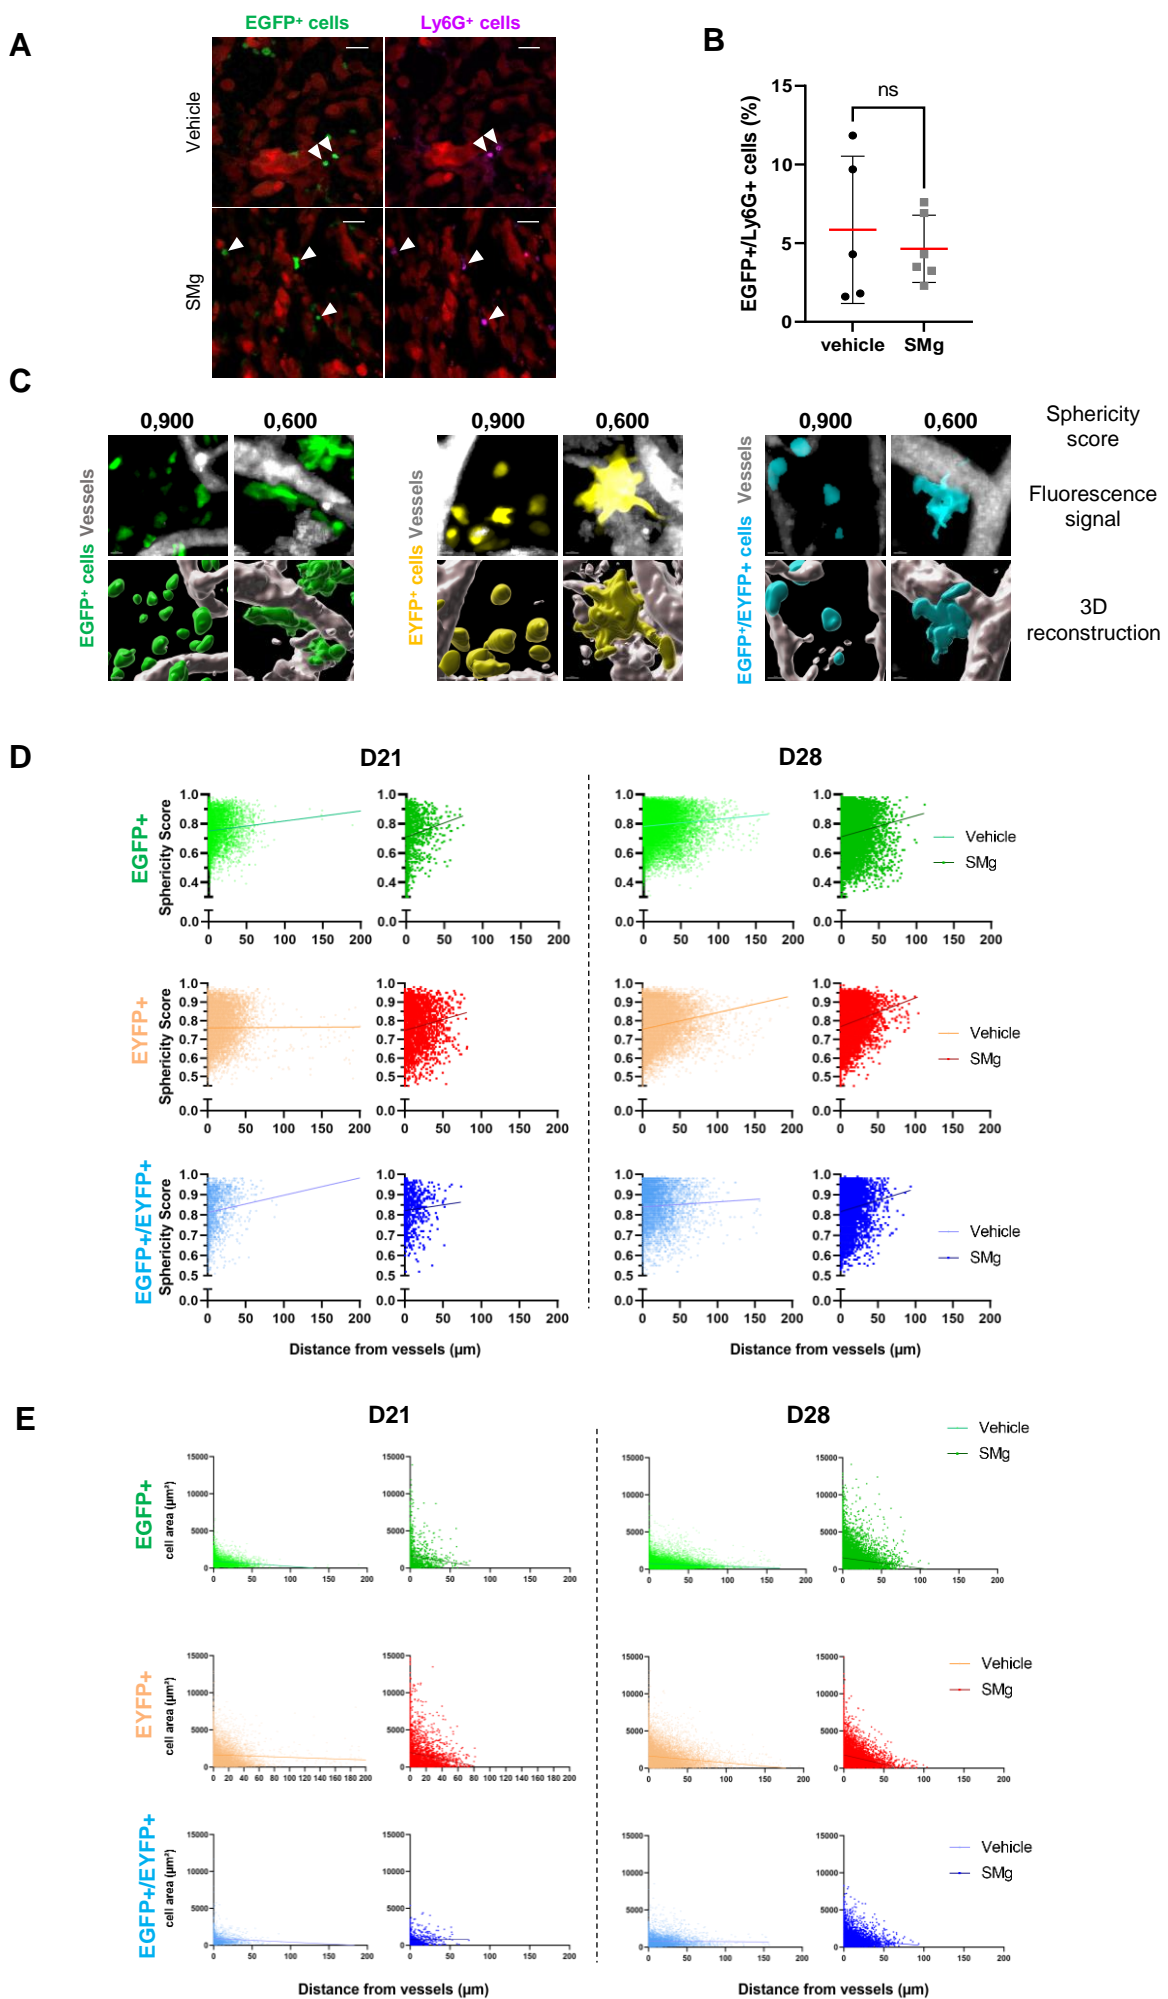

**Fig. S7. SMg modifies the sphericity and the cell surface area of the TAMs.**

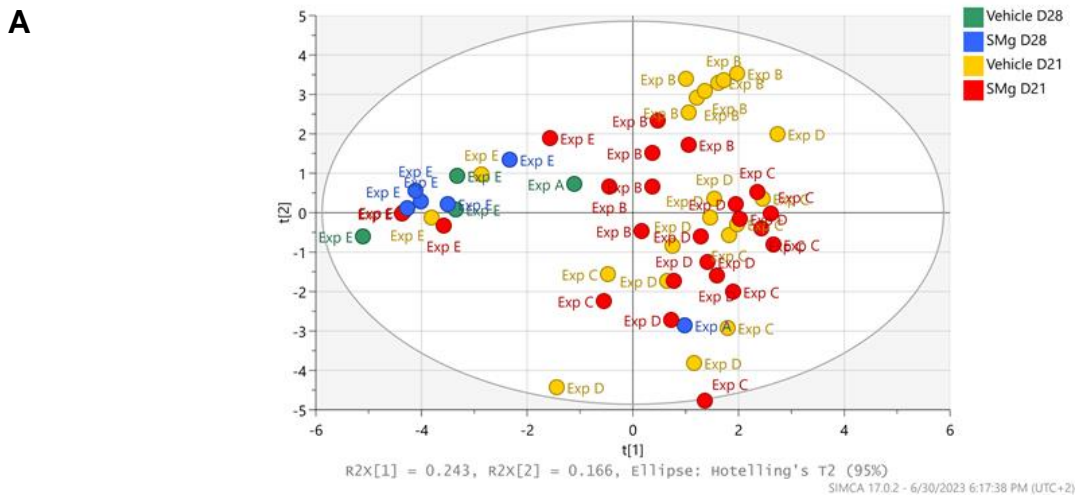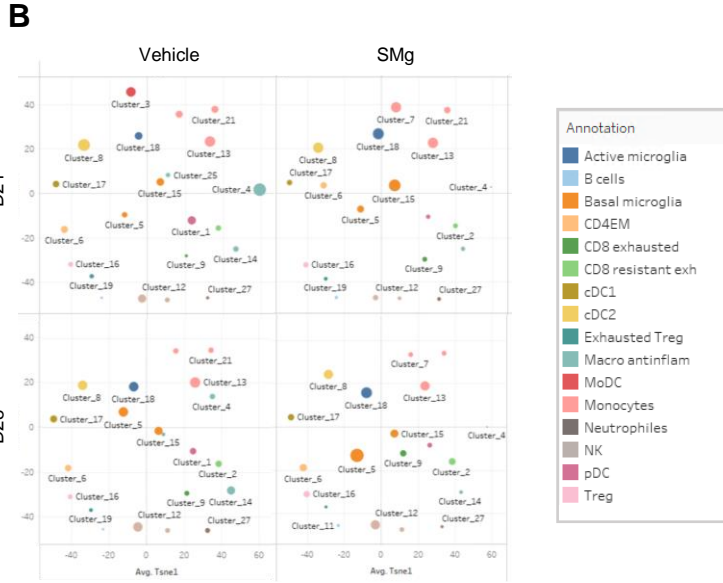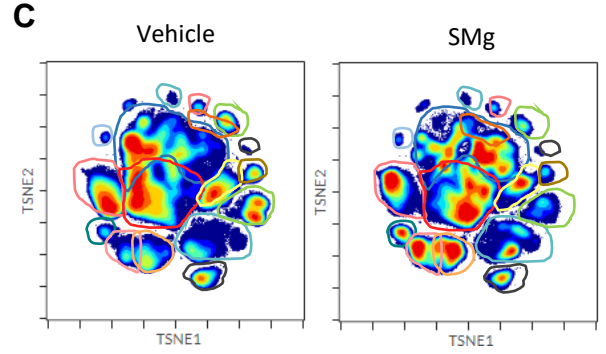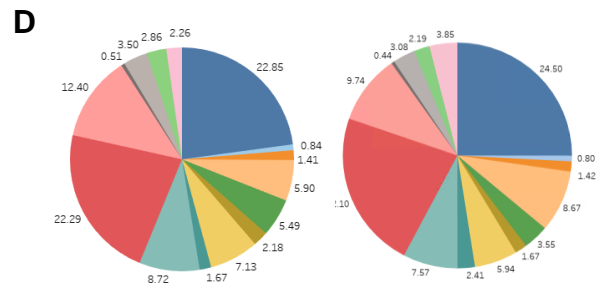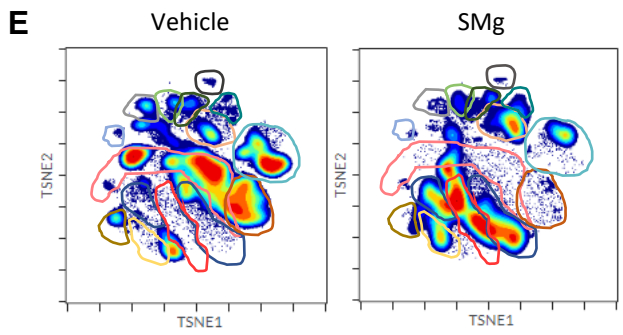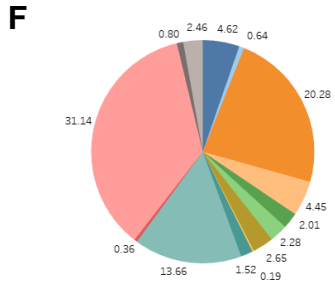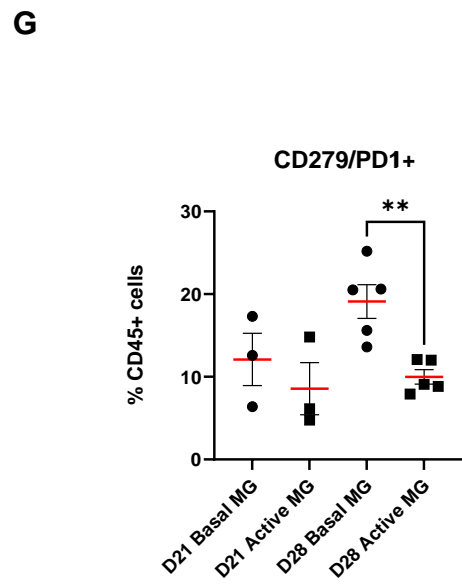

**Fig. S8. SMg reprograms GB immune landscape.**

## A Image treatment

| <b>Imaris tool</b> | 3D reconstruction                                                                   | Fluorescence signal                                                                 | <b>Extracted data</b>                                                                                                                                                                 |
|--------------------|-------------------------------------------------------------------------------------|-------------------------------------------------------------------------------------|---------------------------------------------------------------------------------------------------------------------------------------------------------------------------------------|
| Surface            | 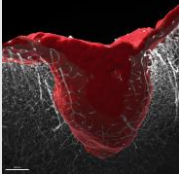   |    | Tumor volume                                                                                                                                                                          |
| Surface            |    |    | Number of voxels<br>Number of CD45 <sup>+</sup> cells                                                                                                                                 |
| Surface - Spot     |    |    | Distance between immune cells and vessels<br>Distance between CD45 <sup>+</sup> cells and tumor center<br>Number of TMEM119 <sup>+</sup> cells in contact with CD8 <sup>+</sup> cells |
| Surface            |    |    | Sphericity score<br>Area                                                                                                                                                              |
| Surface            |   |   | Vessel surface<br>Vessel density                                                                                                                                                      |
| Surface - Surface  |  |  | Distance between EGFP <sup>+</sup> /EYFP <sup>+</sup> cells and vessels                                                                                                               |

## B Data analysis

| <b>Ultramicroscopy</b>                                                 |                 | <b>Two-photon imaging</b>                                            |                               |
|------------------------------------------------------------------------|-----------------|----------------------------------------------------------------------|-------------------------------|
| <b>Parameter</b>                                                       | <b>Unit</b>     | <b>Parameter</b>                                                     | <b>Unit</b>                   |
| Tumor volume                                                           | $\mu\text{m}^3$ | Sphericity score                                                     | -                             |
| Number of voxels                                                       | <i>Voxels</i>   | Area                                                                 | $\mu\text{m}^2$               |
| Number of CD45 <sup>+</sup> cells                                      | -               | Vessel surface                                                       | $\mu\text{m}^2$               |
| Distance between immune cells and vessels                              | $\mu\text{m}$   | Vessel density                                                       | $\mu\text{m}^2/\mu\text{m}^3$ |
| Distance between CD45 <sup>+</sup> cells and tumor center              | $\mu\text{m}$   | Distance from vessels for EGFP <sup>+</sup> /EYFP <sup>+</sup> cells | $\mu\text{m}$                 |
| Distance between TMEM119 <sup>+</sup> cells and CD8 <sup>+</sup> cells | $\mu\text{m}$   |                                                                      |                               |

Fig S9. Images processing pipeline.

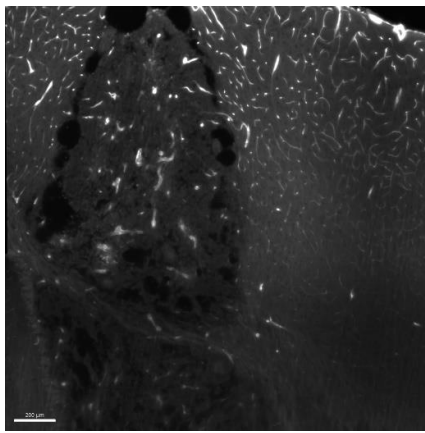

Vessels + Contrast (488 wavelength)

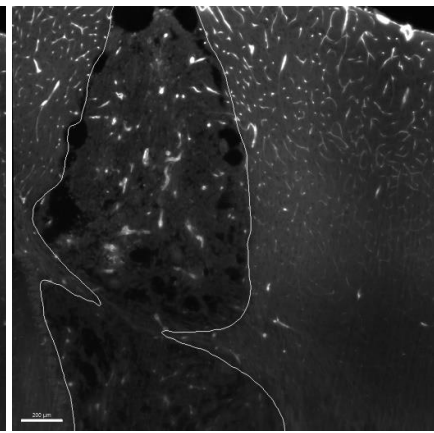

Vessels + Contrast (488 wavelength) + tumor segmentation

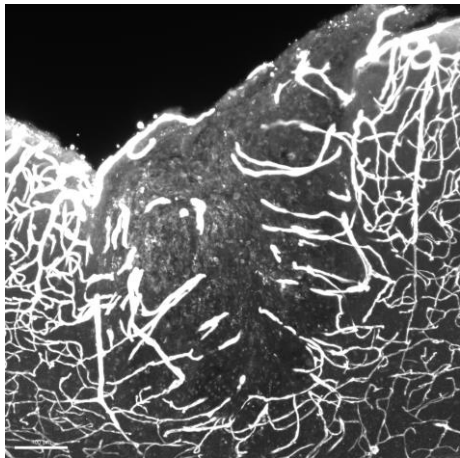

Vessels + Contrast (488 wavelength)

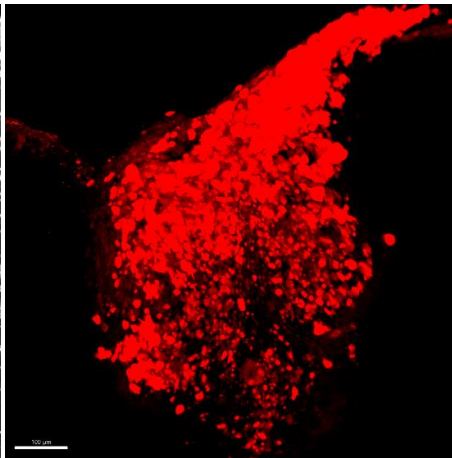

GL261DsRed

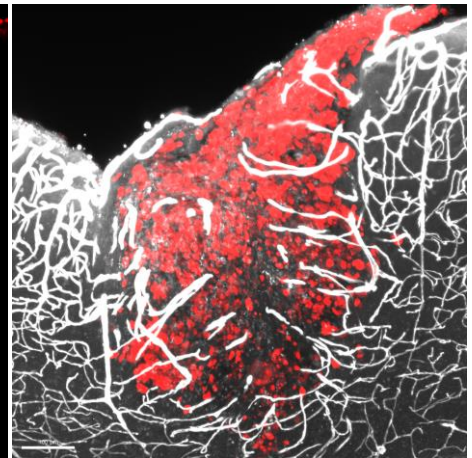

Vessels + Contrast (488 wavelength) + GL261DsRed

**Fig S10. Tumor segmentation based on 488 wavelength contrast**

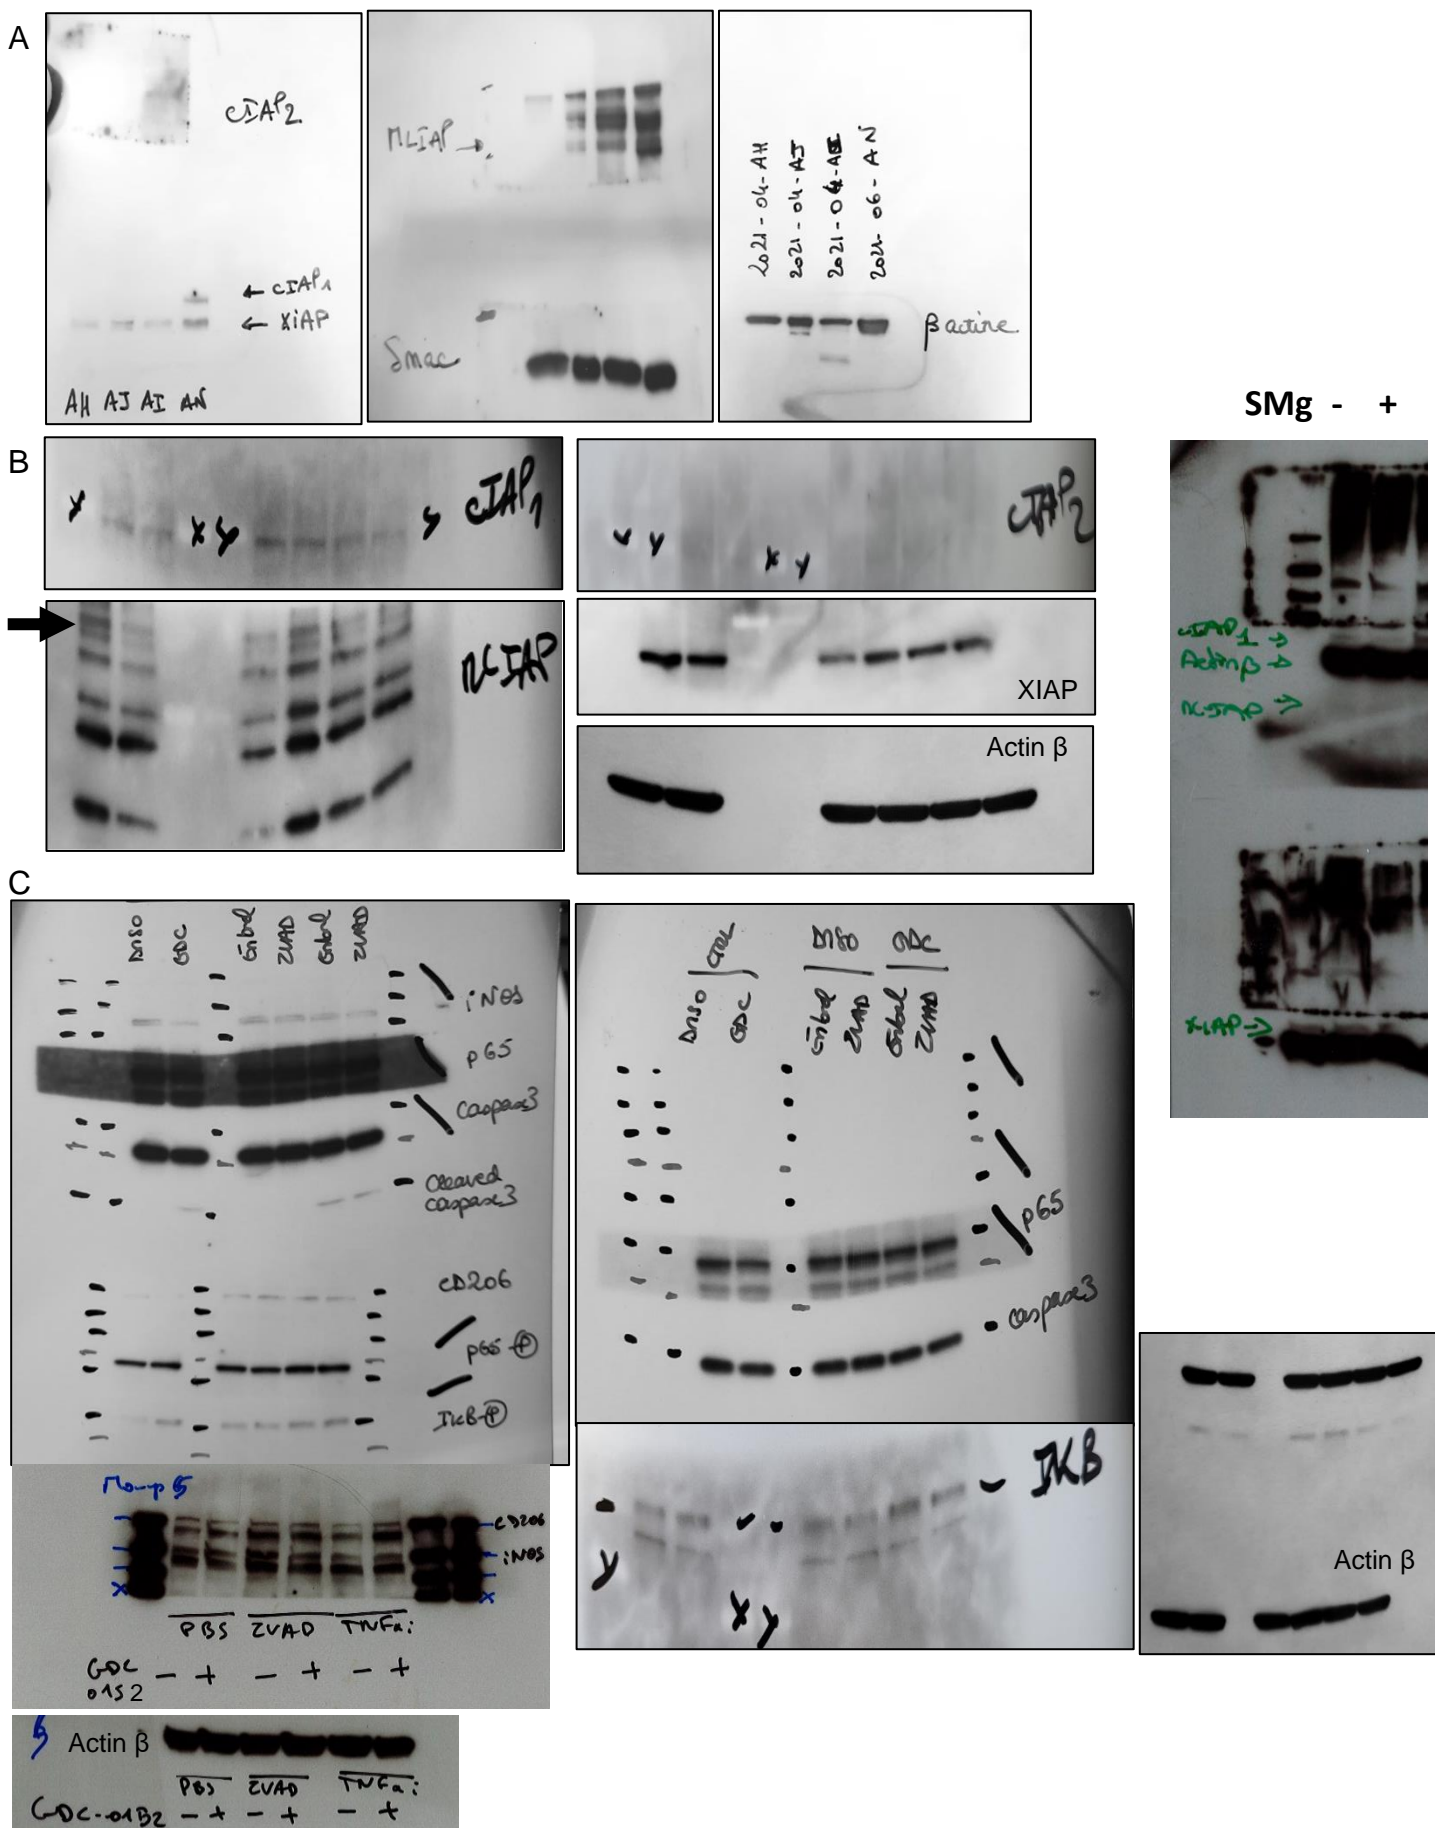

Fig. S11: Original western blots

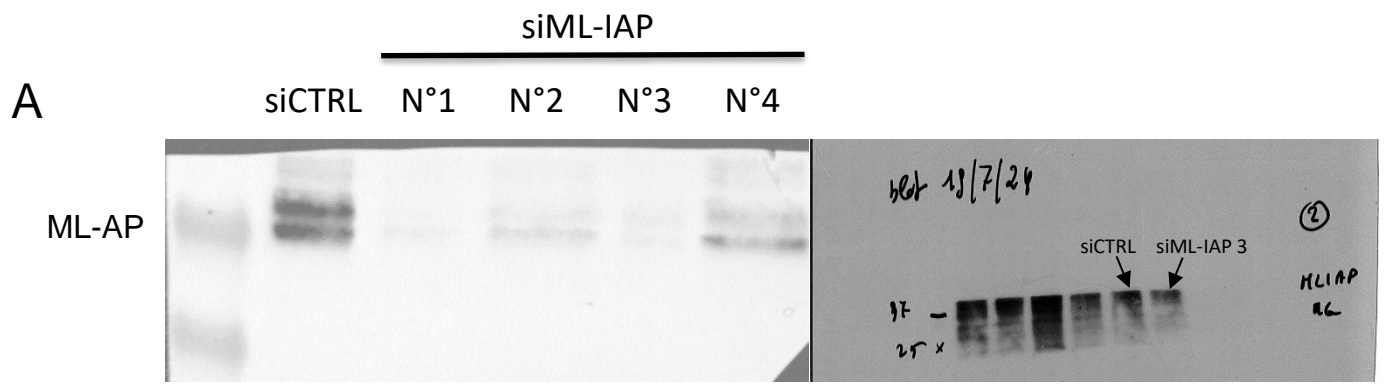

**B** Actin $\beta$

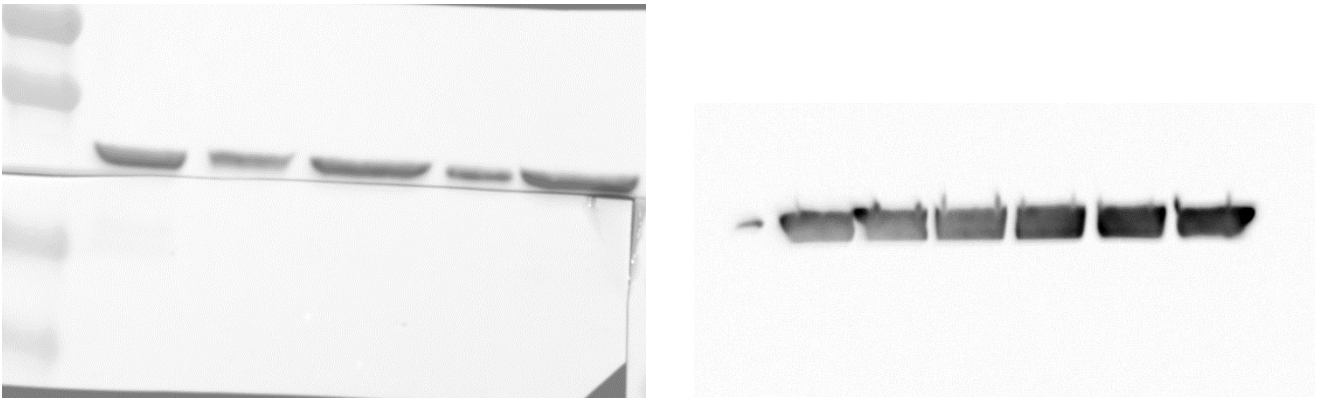

Fig. S12: Original western blots of Fig. S3.

**Table S1: Patient characteristics and clinical data.**

| <b>Characteristics</b>                          | <b>N</b>     | <b>%</b> |
|-------------------------------------------------|--------------|----------|
| <b>Age</b> (median, range), years               | 68 (32 - 82) |          |
| <b>Gender</b> (women / men)                     | 7 / 12       | 37 / 63  |
| <b>Histology</b>                                |              |          |
| Glioblastoma, <i>IDH</i> -wild-type             | 18           | 95       |
| Astrocytoma, <i>IDH</i> -mutated, grade 3       | 1            | 5        |
| <b>MGMT promoter</b>                            |              |          |
| Unmethylated                                    | 11           | 58       |
| Methylated                                      | 7            | 37       |
| NA                                              | 1            | 5        |
| <b>Surgery</b>                                  |              |          |
| Gross total resection                           | 11           | 58       |
| Partial resection                               | 6            | 31       |
| Surgical biopsy                                 | 2            | 11       |
| <b>Karnofsky Performans Status at diagnosis</b> |              |          |
| < 70                                            | 5            | 27       |
| 70                                              | 7            | 37       |
| 80                                              | 6            | 31       |
| NA                                              | 1            | 5        |
| <b>First line treatment</b>                     |              |          |
| Radio-chemotherapy                              | 17           | 89       |
| Chemotherapy alone                              | 2            | 11       |



**Table S2: Antibodies panel.**

| <b>Antibody</b>  | <b>Host</b> | <b>Reactivity</b> | <b>Clone</b> | <b>Conjugated</b> | <b>Mono/polyclonal</b> | <b>Isotope</b> | <b>Experiment</b>   | <b>Dilution</b> | <b>Supplier</b> | <b>Ref</b> | <b>Home-made</b> |
|------------------|-------------|-------------------|--------------|-------------------|------------------------|----------------|---------------------|-----------------|-----------------|------------|------------------|
| Anti-Ly6G        | Rat         | Mouse             | RB6-8C5      | Unconjugated      | monoclonal             | IgG2b          | Immunocytochemistry | 1:50            | Invitrogen      | 14-5931-82 | No               |
| Anti-Laminine    | Rabbit      | Mouse             | -            | Unconjugated      | polyclonal             | IgG            | Immunocytochemistry | 1:100           | Novus bio       | NB300-144  | No               |
| Anti-TMEM119     | Rabbit      | Mouse/<br>Human   | E3E10        | Unconjugated      | monoclonal             | IgG            | Immunocytochemistry | 1:100           | Cell Signaling  | 90840      | No               |
| Anti-MHCII       | Rabbit      | Mouse             | M5/114.15.2  | Unconjugated      | monoclonal             | IgG2b          | Immunocytochemistry | 1:200           | Invitrogen      | 14-5321-82 | No               |
| Anti-RFP         | Rabbit      | Mouse             | -            | Unconjugated      | polyclonal             | IgG            | Whole mount         | 1:2000          | Rockland        | 600401379  | No               |
| Anti-CD45        | Rat         | Mouse             | 30-F11       | Unconjugated      | monoclonal             | IgG2b          | Whole mount         | 1:200           | Santa Cruz      | SC-53665   | No               |
| Anti-CD31        | Goat        | Mouse             | -            | Unconjugated      | polyclonal             | IgG            | Whole mount         | 1:700           | R&D             | AF3628     | No               |
| Anti-Podocalixin | Goat        | Mouse             | -            | Unconjugated      | polyclonal             | IgG            | Whole mount         | 1:700           | R&D             | AF1556     | No               |

|                         |        |                 |                    |              |            |       |              |        |                 |             |    |
|-------------------------|--------|-----------------|--------------------|--------------|------------|-------|--------------|--------|-----------------|-------------|----|
| Anti- $\alpha$ SMA      | Goat   | Mouse           | -                  | Unconjugated | polyclonal | IgG   | Whole mount  | 1:700  | Abcam           | ab21027     | No |
| Anti-TMEM119            | Rabbit | Mouse           | 28-3               | Unconjugated | monoclonal | IgG   | Whole mount  | 1:700  | Abcam           | ab209064    | No |
| Anti-CD8a               | Human  | Mouse           | REA601             | Vio667       | monoclonal | IgG1  | Whole mount  | 1:50   | Miltenyi Biotec | 130-129-594 | No |
| Anti-Smac               | Mouse  | Mouse/<br>Human | 56/Smac/DIA<br>BLO | Unconjugated | monoclonal | IgG   | Western Blot | 1:1000 | BD Biosciences  | 612246      | No |
| Anti-MLIAP              | Mouse  | Mouse/<br>Human | 88C570             | Unconjugated | monoclonal | IgG1k | Western Blot | 1:500  | Novus bio       | NB100-56548 | No |
| Anti-xIAP               | Mouse  | Mouse/<br>Human | -                  | Unconjugated | polyclonal | IgG1  | Western Blot | 1:1000 | BD Biosciences  | 610716      | No |
| Anti-cIAP1              | Rabbit | Mouse/<br>Human | D5G9               | Unconjugated | monoclonal | IgG   | Western Blot | 1:1000 | Cell Signaling  | 7065        | No |
| Anti-cIAP2              | Rabbit | Mouse/<br>Human | -                  | Unconjugated | polyclonal | IgG   | Western Blot | 1:1000 | Merk            | AB3615      | No |
| Anti- $\beta$<br>actine | Mouse  | Mouse/<br>Human | AC-15              | Unconjugated | monoclonal | IgG1  | Western Blot | 1:5000 | Sigma           | A5441       | No |
| Anti-Caspase 3          | Rabbit | Mouse/<br>Human | A5D175             | Unconjugated | Rabbit     | IgG   | Western Blot | 1:1000 | Cell Signaling  | 9661        | No |

|              |        |                 |             |              |            |       |                     |        |                           |                 |    |
|--------------|--------|-----------------|-------------|--------------|------------|-------|---------------------|--------|---------------------------|-----------------|----|
| P-p65        | Rabbit | Mouse/<br>Human | S536        | Unconjugated | monoclonal | IgG   | Western Blot        | 1:100  | Cell Signaling            | 3033            | No |
| P65          | Mouse  | Mouse/<br>Human | F-6         | Unconjugated | monoclonal | IgG   | Western Blot        | 1:50   | Santa Cruz                | Sc-8008         | No |
| iNOS         | Rabbit | Mouse/<br>Human | D6B6S       | Unconjugated | monoclonal | IgG   | Western Blot        | 1:1000 | Cell Signaling            | 13120           | No |
| Anti-CD45    | Mouse  | Mouse/<br>Human | 30-F11      | Unconjugated | monoclonal | IgG2b | Immunocytochemistry | 1:200  | Invitrogen                | 14-0451-<br>82  | No |
| Anti-CD45    | Mouse  | Human           | HI30        | FITC         | monoclonal | IgG1  | Flow Cytometry      | 1:10   | BD pharmagen              | 560976          | No |
| Anti-CD206   | Mouse  | Human           | DCN228      | PE           | monoclonal | IgG1  | Western Blot        | 1:50   | Miltenyi Biotec           | 130-124-<br>233 | No |
| Anti-CD11c   | Human  | Human           | REA618      | PEVio770     | monoclonal | IgG1  | Flow Cytometry      | 1:50   | Miltenyi Biotec           | 130-113-<br>588 | No |
| Anti-TMEM119 | Rabbit | Human           | 106-6       | AF647        | monoclonal | IgG   | Flow Cytometry      | 1:100  | Abcam                     | Ab22549<br>4    | No |
| Anti-IA/IE   | Rat    | Human           | M5/114.15.2 | APCCy7       | monoclonal | IgG2b | Flow Cytometry      | 1:100  | Biolegend                 | 107627          | No |
| Anti-Rat     | Donkey | Rat             | -           | Cy5          | polyclonal | IgG   | Immunocytochemistry | 1:100  | Jackson<br>Immunoresearch | 712-175-<br>150 | No |

|             |        |        |          |                |            |       |                                        |                   |            |        |     |
|-------------|--------|--------|----------|----------------|------------|-------|----------------------------------------|-------------------|------------|--------|-----|
| Anti-Rabbit | Goat   | Rabbit | -        | AlexaFluor 488 | polyclonal | IgG   | Immunocytochemistry                    | 1:1000            | Invitrogen | A11011 | No  |
| Anti-Rabbit | Donkey | Rabbit | Poly4084 | AlexaFluor 647 | polyclonal | IgG   | Immunocytochemistry                    | 1:1000            | Biolegend  | 406414 | No  |
| Anti-Rat    | Donkey | Rat    | MRG2b85  | AlexaFluor 647 | monoclonal | IgG1  | Immunocytochemistry/<br>Brain clearing | 1:1000 /<br>1:600 | Biolegend  | 408209 | No  |
| Anti-Rabbit | Donkey | Rabbit | -        | AlexaFluor 555 | polyclonal | IgG   | Whole mount                            | 1:600             | Invitrogen | A31572 | No  |
| Anti-Goat   | Donkey | Goat   | -        | AlexaFluor 488 | polyclonal | IgG   | Whole mount                            | 1:600             | Invitrogen | A11055 | No  |
| Anti-CD45.2 | Mouse  | Mouse  | 104      | 111 Cd         | monoclonal | IgG2a | Mass Cytometry                         | -                 | Biolegend  | 109802 | Yes |
| Anti-CD45.2 | Mouse  | Mouse  | 104      | 112 Cd         | monoclonal | IgG2a | Mass Cytometry                         | -                 | Biolegend  | 109802 | Yes |
| Anti-CD45.2 | Mouse  | Mouse  | 104      | 114 Cd         | monoclonal | IgG2a | Mass Cytometry                         | -                 | Biolegend  | 109802 | Yes |
| Anti-CD45.2 | Mouse  | Mouse  | 104      | 116 Cd         | monoclonal | IgG2a | Mass Cytometry                         | -                 | Biolegend  | 109802 | Yes |
| Anti-CD45.2 | Mouse  | Mouse  | 104      | 110 Cd         | monoclonal | IgG2a | Mass Cytometry                         | -                 | Biolegend  | 109802 | Yes |

|             |                  |       |          |        |            |       |                |       |            |            |     |
|-------------|------------------|-------|----------|--------|------------|-------|----------------|-------|------------|------------|-----|
| Anti-CD45.2 | Mouse            | Mouse | 104      | 106 Cd | monoclonal | IgG2a | Mass Cytometry | -     | Biolegend  | 109802     | Yes |
| Anti-CD11b  | Rat              | Mouse | M1/70    | 115In  | monoclonal | IgG2b | Mass Cytometry | -     | Biolegend  | 101202     | Yes |
| Anti-CD11c  | Armenian Hamster | Mouse | N418     | 172Yb  | monoclonal | IgG   | Mass Cytometry | -     | Biolegend  | 117341     | Yes |
| Anti-Ly6G   | Rat              | Mouse | 1A8      | 141Pr  | monoclonal | IgG2a | Mass Cytometry | 1:100 | Fluidigm   | 3141008 B  | No  |
| Anti-CD39   | Rat              | Mouse | 24DMS1   | 142Nd  | monoclonal | IgG2a | Mass Cytometry | 1:100 | Fluidigm   | 3142005 B  | No  |
| Anti-CD274  | Rat              | Mouse | 10F.9G2  | 144Nd  | monoclonal | IgG2b | Mass Cytometry | -     | Biolegend  | 124302     | Yes |
| Anti-CD4    | Rat              | Mouse | RM4-5    | 145Nd  | monoclonal | IgG2a | Mass Cytometry | -     | Biolegend  | 100505     | Yes |
| Anti-CD8a   | Rat              | Mouse | 53-6.7   | 146Nd  | monoclonal | IgG2a | Mass Cytometry | -     | Biolegend  | 100746     | Yes |
| Anti-IRF8   | Mouse            | Mouse | V3GYWCH  | 147Sm  | monoclonal | IgG1  | Mass Cytometry | -     | Invitrogen | 53-9852-82 | Yes |
| Anti-CX3CR1 | Mouse            | Mouse | SA011F11 | 148Nd  | monoclonal | IgG2a | Mass Cytometry | -     | Biolegend  | 149002     | Yes |

|            |         |       |           |       |            |       |                |       |            |                  |     |
|------------|---------|-------|-----------|-------|------------|-------|----------------|-------|------------|------------------|-----|
| Anti-IRF4  | Rat     | Mouse | IRF4.3E4  | 149Sm | monoclonal | IgG1  | Mass Cytometry | -     | Biolegend  | 646402           | Yes |
| Anti-Ly6C  | Rat     | Mouse | HK1.4     | 150Nd | monoclonal | IgG2c | Mass Cytometry | -     | Biolegend  | 128002           | Yes |
| Anti-CD64  | Mouse   | Mouse | X54-5/7.1 | 151Eu | monoclonal | IgG1  | Mass Cytometry | 1:100 | Fluidigm   | 3151012<br>B     | No  |
| Anti-CD25  | Rat     | Mouse | 3C7       | 151Eu | monoclonal | IgG2b | Mass Cytometry | 1:100 | Fluidigm   | 3151007<br>B     | No  |
| LysM       | Mouse   | Mouse | MA1-82873 | 152Sm | monoclonal | IgG2a | Mass Cytometry | -     | Invitrogen | BGN-<br>0696-5B1 | Yes |
| Anti-CD152 | Hamster | Mouse | UC10-4B9  | 154Sm | monoclonal | IgG   | Mass Cytometry | 1:100 | Fluidigm   | 3154008<br>B     | No  |
| Anti-CD279 | Rat     | Mouse | 29F.1A12  | 155Gd | monoclonal | IgG2a | Mass Cytometry | -     | Biolegend  | 135202           | Yes |
| Anti-CD192 | Rat     | Mouse | SA203G11  | 156Gd | monoclonal | IgG2b | Mass Cytometry | -     | Biolegend  | 93501            | Yes |
| Anti-CD68  | Rat     | Mouse | FA-11     | 158Gd | monoclonal | IgG2a | Mass Cytometry | -     | Invitrogen | 14-0681-<br>82   | Yes |
| Anti-CD73  | Rat     | Mouse | TY11.8    | 159Tb | monoclonal | IgG1  | Mass Cytometry | -     | Biolegend  | 127202           | Yes |

|                   |                |       |          |       |            |       |                |       |                 |                  |     |
|-------------------|----------------|-------|----------|-------|------------|-------|----------------|-------|-----------------|------------------|-----|
| Anti-FoxP3        | Rat            | Mouse | MF14     | 161Dy | monoclonal | IgG2b | Mass Cytometry | -     | Biolegend       | 126402           | Yes |
| Anti-TNF $\alpha$ | Rat            | Mouse | MP6-XT22 | 162Dy | monoclonal | IgG1  | Mass Cytometry | 1:100 | Fluidigm        | 3162002<br>B     | No  |
| Anti-Klrg1        | Syrian hamster | Mouse | 2F1      | 163Dy | monoclonal | IgG   | Mass Cytometry | -     | Invitrogen      | 16-5893-<br>85   | Yes |
| Anti-CD172a       | Rat            | Mouse | P84      | 164Dy | monoclonal | IgG   | Mass Cytometry | -     | BD Bioscience   | 51-410-<br>28671 | Yes |
| Anti- MER-TK      | Human          | Mouse | REA477   | 165Ho | monoclonal | IgG1  | Mass Cytometry | -     | Miltenyi Biotec | 130-107-<br>477  | Yes |
| Anti-CD26         | Rat            | Mouse | H194-112 | 166Er | monoclonal | IgG2a | Mass Cytometry | -     | Biolegend       | 137801           | Yes |
| Anti-F4/80        | Rat            | Mouse | BM8      | 167Er | monoclonal | IgG2a | Mass Cytometry | -     | Biolegend       | 123102           | Yes |
| Anti- XCR1        | Mouse          | Mouse | ZET      | 168Er | monoclonal | IgG2b | Mass Cytometry | -     | Biolegend       | 148202           | Yes |
| Anti-CD206        | Rat            | Mouse | C068C2   | 169Tm | monoclonal | IgG2a | Mass Cytometry | 1:100 | Fluidigm        | 3169021<br>B     | No  |
| Anti-CD161        | Mouse          | Mouse | PK136    | 170Er | monoclonal | IgG2a | Mass Cytometry | 1:100 | Fluidigm        | 3170002<br>B     | No  |

|            |                  |       |             |       |            |       |                |       |                |              |     |
|------------|------------------|-------|-------------|-------|------------|-------|----------------|-------|----------------|--------------|-----|
| Anti-CD44  | Rat              | Mouse | IM7         | 171Yb | monoclonal | IgG2b | Mass Cytometry | 1:100 | Fluidigm       | 3171003<br>B | No  |
| Anti-CD317 | Rat              | Mouse | 129c1       | 173Yb | monoclonal | IgG2b | Mass Cytometry | -     | Biolegend      | 127102       | Yes |
| Anti-Gata3 | Mouse            | Mouse | 16E10A23    | 175Lu | monoclonal | IgG2b | Mass Cytometry | -     | Biolegend      | 653802       | Yes |
| Anti-CD62L | Rat              | Mouse | MEL-14      | 160Gd | monoclonal | IgG2a | Mass Cytometry | 1:100 | Fluidigm       | 3160008<br>B | No  |
| Anti-CD3e  | Armenian hamster | Mouse | 145-2C11    | 176Yb | monoclonal | IgG   | Mass Cytometry | -     | Biolegend      | 100302       | Yes |
| Anti-IA IE | Rat              | Mouse | M5/114.15.2 | 209Bi | monoclonal | IgG2b | Mass Cytometry | -     | Fluidigm       | 3209006<br>B | No  |
| Anti-CD38  | Rat              | Mouse | 90          | 153Eu | monoclonal | IgG2a | Mass Cytometry | -     | Biolegend      | 102702       | Yes |
| Anti-CD88  | Rat              | Mouse | 20,7        | 174Yb | monoclonal | IgG2b | Mass Cytometry | -     | Biolegend      | 135802       | Yes |
| Anti-Eomes | Mouse            | Mouse | 7C9B03      | 143Nd | monoclonal | IgG1  | Mass Cytometry | -     | Biolegend      | 662002       | Yes |
| Anti-Iba1  | Rabbit           | Mouse | E404W       | 113In | monoclonal | IgG   | Mass Cytometry | -     | Cell signaling | 17198B       | Yes |



|             |       |       |        |     |            |       |                |        |              |        |    |
|-------------|-------|-------|--------|-----|------------|-------|----------------|--------|--------------|--------|----|
| Anti-CD45.2 | Mouse | Mouse | 104    | APC | monoclonal | IgG2a | Mass Cytometry | 1:1000 | Biolegend    | 109814 | No |
| Anti-Ter119 | Rat   | Mouse | TER119 | PE  | monoclonal | IgG2b | Mass Cytometry | 1:100  | BD pharmagen | 553673 | No |
| SytoxGreen  | -     | -     | -      | -   | -          | -     | Mass Cytometry | -      | Invitrogen   | S7020  | No |
